# Supplementary material for: FgSfl1 and Its Conserved PKA Phosphorylation Sites Are Important for Conidiation, Sexual Reproduction, and Pathogenesis in Fusarium graminearum
Source: MDPI journal article supplement (doi:10.3390/jof7090755), 2021-09-14
Supplement: s1 [file s1]

## Supporting Information Legends

**Table S1.** PCR primers used in this study.

| Name                       | Sequence(5'-3')                                                                  |
|----------------------------|----------------------------------------------------------------------------------|
| FgSFL1/1F                  | AACCGCTTGAACCAGCTACA                                                             |
| FgSFL1/2R (hph)            | TTGACCTCCACTAGCTCCAGCCAAGCCAGATAAATGAAGGCAA<br>GGTC                              |
| FgSFL1/2R (ble)            | GTGTTGACCTCCACTAGCTCCAGCCACTGATGGTTAGTCGACAA<br>GAAGGAT                          |
| FgSFL1/3F (hph)            | GAATAGAGTAGATGCCGACCGCGGGTTGGCAGGCATTCTGTTTG<br>ACC                              |
| FgSFL1/3F (ble)            | ACGAATTGCTTGCAGGCATCTCATGACGACGACAGAAAGAGAA<br>AGC                               |
| FgSFL1/4R                  | ACCCTTGACTGGCACTGAAT                                                             |
| FgSFL1/5F                  | ATACAAAGCCTGTGACATCGC                                                            |
| FgSFL1/6R                  | AAGGGACATTCAGAGTAGGA                                                             |
| FgSFL1/7F                  | CTGTGCTGTTTCGTCAATC                                                              |
| FgSFL1/8R                  | CGACTCAAACCCAACTCAT                                                              |
| FgSFL1/CF                  | CGACTCACTATAGGGCGAATTGGGTACTCAAATTGGATTCCCGT<br>CCTTCTTCCACAC                    |
| FgSFL1/CR2                 | CACCACCCCGGTGAACAGCTCCTCGCCCTTGCTCACACCCTTGA<br>CTGGCACTGAAT                     |
| FgSFL1/R FLAG-HA           | CCTCCTCGCCCTTGCTCACTTAATGTACCCATACGATGTTCCAGA<br>TTACGCTCTTGTCATCGTCATCCTTGTAATC |
| FgSFL1 <sup>S223D</sup> /F | TACGTGAGATCAAGCGTCGAGCCGATAGGCATGC                                               |
| FgSFL1 <sup>S223D</sup> /R | CAAGTGCATGCCTATCGGCTCGACGCTTGATCTCACGTA                                          |
| FgSFL1 <sup>T452D</sup> /F | CCTGGTAGCTTAGCACGCCGTACGATGCTGCCGACATCC                                          |
| FgSFL1 <sup>T452D</sup> /R | GGATGTCGGCAGCATCGTGACGGCGTGCTAAGCTACCAGG                                         |
| FgSFL1 <sup>S559D</sup> /F | CCCACAACCTCGACGTGGAGACATGGCTCATATTCTCAACCCGA                                     |
| FgSFL1 <sup>S559D</sup> /R | ATGAGCCATGTCTCCACGTCGAGTTGTGG                                                    |
| FgSFL1 <sup>S223A</sup> /F | TACGTGAGATCAAGCGTCGAGCCGCTAGGCATGC                                               |
| FgSFL1 <sup>S223A</sup> /R | CAAGTGCATGCCTAGCGGCTCGACGCTTGATCTCACGTA                                          |
| FgSFL1 <sup>T452A</sup> /F | CCTGGTAGCTTAGCACGCCGTACGCTGCTGCCGACATCC                                          |
| FgSFL1 <sup>T452A</sup> /R | GGATGTCGGCAGCAGCGTGACGGCGTGCTAAGCTACCAGG                                         |
| FgSFL1 <sup>S559A</sup> /F | CCCACAACCTCGACGTGGAGCCATGGCTCATATTCTCAACCCGA                                     |
| FgSFL1 <sup>S559A</sup> /R | ATGAGCCATGGCTCCACGTCGAGTTGTGG                                                    |
| YG/F                       | GATGTAGGAGGGCGTGATATGTCTT                                                        |
| HY/R                       | GTATTGACCGATTCTTGCAGTCCGAA                                                       |
| HYG/F                      | GGCTTGGCTGGAGCTAGTGGAGGTCAA                                                      |
| HYG/R                      | AACCCGCGGTCGGCATCTACTCTATT                                                       |
| H852                       | ATGTTGGCGACCTCGTATTGG                                                            |
| H850                       | TTCCTCCCTTTATTTCAGATTCAA                                                         |
| H855/R                     | GCTGATCTGACCAGTTGC                                                               |
| H856/F                     | GTCGATGCGACGCAATCGT                                                              |
| BLE/F                      | CGAGCTCACTACACTAAACTCCCCGCTTCTCTC                                                |
| BLE/R                      | TCATGAGATGCCTGCAAGCA                                                             |
| B850/F                     | TCAGCCCACTTGTAAGCAGTAGC                                                          |
| B852/R                     | CTGGATGCCGACGGATTTG                                                              |
| PFL2 insert/F              | TAACGCCAGGGTTTTCCCAGTCA                                                          |
| PFL2 insert/R              | CGTGCTGCTTCATGTGGTCGG                                                            |
| TUP1 Seq/F                 | AGAGGGTGTGCGAACAGAGT                                                             |
| TUP1 Seq/R                 | TCCTACCCATCCTTGACGGC                                                             |
| MSN2 Seq/F                 | TGCTAGTCCCTCTGTGGTG                                                              |
| MSN2 Seq/R                 | CTTCGCTACCTTGCCAGAC                                                              |
| RIM15 Seq/F                | CCACTTGTGCTTCCGCTA                                                               |
| RIM15 Seq/R                | CAATGCTGCTCGTGTGCCA                                                              |
| SOK1 Seq/F                 | AACCCACTCGCTTCATCG                                                               |

---

|             |                        |
|-------------|------------------------|
| SOK1 Seq/R  | AATGTGAGTGTGAGTTCCG    |
| YAK1 Seq/F  | CAACGCCCCGATAACCACGCA  |
| YAK1 Seq/R  | AGAATCCCAACTTCCAATCCA  |
| CDTF1 Seq/F | TCAGAACTTAGTCCAACACACG |
| CDTF1 Seq/R | ACTCAGGACCTCATCGCCAC   |
| SOM1 Seq/F  | CTCGCGCCTTTTGGGATTAC   |
| SOM1 Seq/R  | CCGTGACAAATGATGCCTG    |
| PDE2 Seq/F  | ACCACCTCTTCAGACCCGAC   |
| PDE2 Seq/R  | ATTAGGGCGACTCAAAACC    |
| 01000F      | GATCCTACGTTCCCATCATCTC |
| 01000R      | GATAGTGATCTCGGCCATCTTC |
| 02139F      | GCGAAGGAGCAATAGGGTTAT  |
| 02139R      | ACGCTTTGAGTCTGGCTATG   |
| 02894F      | ACTACTCCTACGAACCCTCTAC |
| 02894R      | TCTTGTCTGATGGACGAATCTG |
| 04923F      | CTACAGTGACGGCAGTCTTATC |
| 04923R      | CCAAGATAGCCAAACCAGTCT  |
| 05345F      | CCCGAGTCAAGTCCTTCTTTG  |
| 05345R      | GGCCAGTGACGTTCTCAATAA  |
| 05839F      | GACCCTTTCCATGACTACTTCC |
| 05839R      | CAGATCACCGATCCAGAGAATG |
| 06014F      | GAAGAAGGTCAAGCGTCAATTC |
| 06014R      | GAAGCGTCCTCGGCTAATAC   |
| 06304F      | TCAGATTGCCCACCGATTT    |
| 06304R      | CTTGTATACCGGCTGCACATA  |
| 06462F      | GTATCGCCGTCAACATACT    |
| 06462R      | TCCTCCCTCGTCGTCAATATAA |
| 08264F      | GTACTACCCACTGCGTCTTATT |
| 08264R      | GTGATGTTGTGGTGTTGGATG  |
| 08343F      | GTCAGTGGCTGTTGAGAAGTAT |
| 08343R      | CGAAAGACACTTTGGCACTTG  |
| 09821F      | TCTCAAGAACGAAACCGTCAA  |
| 09821R      | GGTGACTCAGGTCGAACATATC |
| 11032F      | GCGAAGTCTATAGCCCATCTTC |
| 11032R      | GTTGTCTGAACGGTACAATCCT |
| 11368F      | GTCTACCATGGCGAAGAGTG   |
| 11368R      | TGACTAGGTTGCCATCTTCTTG |
| 11656F      | CTCGATCCAGATCAGCCATTAC |
| 11656R      | CATGGCAGAACGATCACTAAGA |

---

**Table S2. Genes up-regulated in the *Fgsf11* mutant in comparison with the wild type.**

| Gene ID              | MIPS ID    | Broad ID   | Gene Name <sup>†</sup> | Fold Change | Yeast_Top_Homolog (<1E-5) <sup>‡</sup> |            |                                                                                                                                                                                                                                                    | NR Hits <sup>§</sup>                             |
|----------------------|------------|------------|------------------------|-------------|----------------------------------------|------------|----------------------------------------------------------------------------------------------------------------------------------------------------------------------------------------------------------------------------------------------------|--------------------------------------------------|
|                      |            |            |                        |             | Yeast_ID                               | Yeast_Gene | Yeast_Description                                                                                                                                                                                                                                  |                                                  |
| FGRRES_16527         | FGSG_05697 | FGSG_05697 |                        | 2.06        |                                        |            | trehalose 6-phosphate synthase                                                                                                                                                                                                                     |                                                  |
| FGRRES_04919         | FGSG_04919 | FGSG_04919 |                        | 2.07        |                                        |            | potassium sodium efflux p-type fungal-type                                                                                                                                                                                                         |                                                  |
| FGRRES_09053         | FGSG_09053 | FGSG_09053 |                        | 2.07        |                                        |            | uncharacterized protein y057_3636                                                                                                                                                                                                                  |                                                  |
| FGRRES_13252_16931_M | FGSG_13252 | FGSG_13252 |                        | 2.07        |                                        |            | uncharacterized protein y057_3069                                                                                                                                                                                                                  |                                                  |
| FGRRES_09908         | FGSG_09908 | FGSG_09908 | PKR1                   | 2.07        | YIL033C                                | BCY1       | Regulatory subunit of the cyclic AMP-dependent protein kinase (PKA); PKA is a component of a signaling pathway that controls a variety of cellular processes, including metabolism, cell cycle, stress response, stationary phase, and sporulation | camp-dependent protein kinase regulatory subunit |
| FGRRES_07275         | FGSG_07275 | FGSG_07275 |                        | 2.08        |                                        |            |                                                                                                                                                                                                                                                    | uncharacterized protein ffuj_03186               |
| FGRRES_00172         | FGSG_00172 | FGSG_00172 |                        | 2.08        |                                        |            |                                                                                                                                                                                                                                                    | glutathione s-transferase                        |
| FGRRES_07925         | FGSG_07925 | FGSG_07925 |                        | 2.09        |                                        |            |                                                                                                                                                                                                                                                    | uncharacterized protein ffuj_13710               |
| FGRRES_06190         | FGSG_06190 | FGSG_06190 |                        | 2.14        |                                        |            |                                                                                                                                                                                                                                                    | plant basic secretory protein                    |
| FGRRES_12154         | FGSG_12154 | FGSG_12154 |                        | 2.15        | YIR038C                                | GTT1       | ER associated glutathione S-transferase; capable of homodimerization;                                                                                                                                                                              | glutathione s-transferase                        |

|                |                           |                       |      |                                                                                                                                                                                         |
|----------------|---------------------------|-----------------------|------|-----------------------------------------------------------------------------------------------------------------------------------------------------------------------------------------|
|                |                           |                       |      | glutathione transferase for Yvc1p vacuolar cation channel; expression induced during the diauxic shift and throughout stationary phase; functional overlap with Gtt2p, Grx1p, and Grx2p |
| FGRRES_05659   | FGSG_05659                | FGSG_05659            | 2.15 | mfs phs inorganic phosphate transporter                                                                                                                                                 |
| FGRRES_02443_M | FGSG_02443                | FGSG_02443            | 2.16 | uncharacterized protein ffuj_07766                                                                                                                                                      |
| FGRRES_04639   | FGSG_04639                | FGSG_04639            | 2.18 | uncharacterized protein ffuj_01997                                                                                                                                                      |
| FGRRES_03363   | FGSG_03363                | FGSG_03363            | 2.18 | long-chain-fatty-acid-- ligase                                                                                                                                                          |
| FGRRES_16031   | FGSG_02692                | FGSG_02692            | 2.18 | family taurine catabolism dioxygenase                                                                                                                                                   |
| FGRRES_07148   | FGSG_07148                | FGSG_07148            | 2.22 | uncharacterized protein ffuj_02694                                                                                                                                                      |
| FGRRES_04913   | FGSG_04913                | FGSG_04913            | 2.24 | related to beta-glucosidase                                                                                                                                                             |
| FGRRES_11924   | FGSG_11924                | FGSG_11924            | 2.24 | hypothetical protein FGSG_11924 [Fusarium graminearum PH-1]                                                                                                                             |
| FGRRES_17323   | FGSG_13710,F<br>GSG_13711 | FGSG_13710,FGSG_13711 | 2.24 | uncharacterized protein lw93_13800                                                                                                                                                      |
| FGRRES_04182   | FGSG_04182                | FGSG_04182            | 2.24 | carnitine transporter                                                                                                                                                                   |
| FGRRES_03894_M | FGSG_03894                | FGSG_03894            | 2.25 | uncharacterized protein ffuj_14322                                                                                                                                                      |
| FGRRES_10843   | FGSG_10843                | FGSG_10843            | 2.29 | histone-lysine n-methyltransferase ash1                                                                                                                                                 |
| FGRRES_00540   | FGSG_00540                | FGSG_00540            | 2.30 | gnat family acetyltransferase                                                                                                                                                           |
| FGRRES_01631   | FGSG_01631                | FGSG_01631            | 2.32 | integral membrane protein                                                                                                                                                               |
| FGRRES_15880   | FGSG_01733                | FGSG_01733            | 2.32 | uncharacterized protein lw93_11253                                                                                                                                                      |
| FGRRES_03593   | FGSG_03593                | FGSG_03593            | 2.32 | 6-hydroxy-d-nicotine oxidase                                                                                                                                                            |
| FGRRES_10909   | FGSG_10909                | FGSG_10909            | 2.32 | spfh domain band 7 family protein                                                                                                                                                       |
| FGRRES_08113_M | FGSG_08113                | FGSG_08113            | 2.33 | peptidase c14                                                                                                                                                                           |

|              |            |            |      |         |      |                                                                                                                                                                          |                                                       |
|--------------|------------|------------|------|---------|------|--------------------------------------------------------------------------------------------------------------------------------------------------------------------------|-------------------------------------------------------|
| FGRRES_05957 | FGSG_05957 | FGSG_05957 | 2.33 |         |      |                                                                                                                                                                          | duf967 domain protein                                 |
| FGRRES_00522 | FGSG_00522 | FGSG_00522 | 2.33 |         |      |                                                                                                                                                                          | uncharacterized protein ffuj_01038                    |
| FGRRES_06188 | FGSG_06188 | FGSG_06188 | 2.35 |         |      |                                                                                                                                                                          | uncharacterized protein ffuj_04959                    |
| FGRRES_10867 | FGSG_10867 | FGSG_10867 | 2.36 |         |      |                                                                                                                                                                          | uncharacterized protein lw93_6273                     |
|              | FGSG_02231 | FGSG_02231 | 2.36 | YAL049C | AIM2 | Cytoplasmic protein involved in mitochondrial function or organization; null mutant displays reduced frequency of mitochondrial genome loss; potential Hsp82p interactor | dienelactone hydrolase                                |
| FGRRES_02231 |            |            |      |         |      |                                                                                                                                                                          |                                                       |
| FGRRES_02924 | FGSG_02924 | FGSG_02924 | 2.36 |         |      |                                                                                                                                                                          | sarcosine oxidase                                     |
| FGRRES_02075 | FGSG_02075 | FGSG_02075 | 2.37 |         |      |                                                                                                                                                                          | oxidoreductase                                        |
| FGRRES_12760 | FGSG_12760 | FGSG_12760 | 2.37 |         |      |                                                                                                                                                                          | uncharacterized protein ffuj_08719                    |
|              | FGSG_11300 | FGSG_11300 | 2.38 |         |      |                                                                                                                                                                          | a retinal short-chain dehydrogenase reductase         |
| FGRRES_11300 |            |            |      |         |      |                                                                                                                                                                          |                                                       |
| FGRRES_04805 | FGSG_04805 | FGSG_04805 | 2.38 |         |      |                                                                                                                                                                          | uncharacterized protein ffuj_02291                    |
| FGRRES_01751 | FGSG_01751 | FGSG_01751 | 2.40 |         |      |                                                                                                                                                                          | serine threonine-protein kinase sgk2                  |
| FGRRES_13718 | FGSG_13718 | FGSG_13718 | 2.40 |         |      |                                                                                                                                                                          | uncharacterized protein ffuj_07258                    |
|              | FGSG_04191 | FGSG_04191 | 2.41 |         |      |                                                                                                                                                                          | regulatory protein for the arginine catabolic pathway |
| FGRRES_16137 |            |            |      |         |      |                                                                                                                                                                          |                                                       |
| FGRRES_08023 | FGSG_08023 | FGSG_08023 | 2.41 |         |      |                                                                                                                                                                          | isotrichodermin c-15 hydroxylase                      |
|              | FGSG_03365 | FGSG_03365 | 2.43 |         |      |                                                                                                                                                                          | endonuclease exonuclease phosphatase family protein   |
| FGRRES_03365 |            |            |      |         |      |                                                                                                                                                                          |                                                       |
| FGRRES_07152 | FGSG_07152 | FGSG_07152 | 2.43 |         |      |                                                                                                                                                                          | glucose repressible protein grg1                      |
|              | FGSG_07896 | FGSG_07896 | 2.45 | YLL063C | AYT1 | Acetyltransferase; catalyzes trichothecene 3-O-acetylation, suggesting a                                                                                                 | trichothecene 3-o- partial                            |
| FGRRES_07896 |            |            |      |         |      |                                                                                                                                                                          |                                                       |

|                |            |            |      |              | possible role in trichothene biosynthesis                                                                                                                                                                           |
|----------------|------------|------------|------|--------------|---------------------------------------------------------------------------------------------------------------------------------------------------------------------------------------------------------------------|
| FGRRES_03288   | FGSG_03288 | FGSG_03288 | 2.46 |              | acid beta-fructofuranosidase precursor                                                                                                                                                                              |
| FGRRES_09502   | FGSG_09502 | FGSG_09502 | 2.48 |              | uncharacterized protein ffuj_04369                                                                                                                                                                                  |
| FGRRES_12829   | FGSG_12829 | FGSG_12829 | 2.48 |              | uncharacterized protein lw93_8250                                                                                                                                                                                   |
| FGRRES_10537   | FGSG_10537 | FGSG_10537 | 2.50 |              | d-amino acid oxidase                                                                                                                                                                                                |
| FGRRES_16170   | FGSG_03995 | FGSG_03995 | 2.52 |              | vegetative incompatibility protein het-e-1                                                                                                                                                                          |
| FGRRES_16274_M | FGSG_03415 | FGSG_03415 | 2.52 |              | c6 transcription factor                                                                                                                                                                                             |
| FGRRES_17037   | FGSG_08437 | FGSG_08437 | 2.55 |              | uncharacterized protein ffuj_06074                                                                                                                                                                                  |
| FGRRES_07829   | FGSG_07829 | FGSG_07829 | 2.56 |              | extracellular serine-rich protein                                                                                                                                                                                   |
| FGRRES_04223   | FGSG_04223 | FGSG_04223 | 2.57 |              | alcohol dehydrogenase (nadp+)                                                                                                                                                                                       |
| FGRRES_02557_M | FGSG_02557 | FGSG_02557 | 2.57 |              | vegetative incompatibility protein het-e-1                                                                                                                                                                          |
| FGRRES_01532   | FGSG_01532 | FGSG_01532 | 2.59 |              | uncharacterized protein lw93_11484                                                                                                                                                                                  |
| FGRRES_01650_M | FGSG_01650 | FGSG_01650 | 2.59 |              | protein png1                                                                                                                                                                                                        |
| FGRRES_03785_M | FGSG_03785 | FGSG_03785 | 2.59 |              | triacylglycerol lipase                                                                                                                                                                                              |
| FGRRES_12418   | FGSG_12418 | FGSG_12418 | 2.61 |              | uncharacterized protein lw93_10957                                                                                                                                                                                  |
| FGRRES_10162   | FGSG_10162 | FGSG_10162 | 2.63 |              | uncharacterized protein y057_2444                                                                                                                                                                                   |
| FGRRES_10132   | FGSG_10132 | FGSG_10132 | 2.64 |              | gtp-binding protein                                                                                                                                                                                                 |
| FGRRES_01286   | FGSG_01286 | FGSG_01286 | 2.65 |              | uncharacterized protein ffuj_01482                                                                                                                                                                                  |
|                | FGSG_05066 | FGSG_05066 | 2.67 | YGR157W CHO2 | Phosphatidylethanolamine methyltransferase (PEMT); catalyzes the first step in the conversion of phosphatidylethanolamine to phosphatidylcholine during the methylation pathway of phosphatidylcholine biosynthesis |
| FGRRES_17643   |            |            |      |              | phosphatidylethanolamine n-methyltransferase                                                                                                                                                                        |

|                |            |            |      |         |      |                                                                                                                                                                                                                                                                                |
|----------------|------------|------------|------|---------|------|--------------------------------------------------------------------------------------------------------------------------------------------------------------------------------------------------------------------------------------------------------------------------------|
| FGRRES_03395   | FGSG_03395 | FGSG_03395 | 2.68 |         |      | uncharacterized protein lw94_14401                                                                                                                                                                                                                                             |
| FGRRES_03500_M | FGSG_03500 | FGSG_03500 | 2.69 |         |      | uncharacterized protein lw93_3111                                                                                                                                                                                                                                              |
| FGRRES_05834_M | FGSG_05834 | FGSG_05834 | 2.69 |         |      | uncharacterized protein lw94_11295                                                                                                                                                                                                                                             |
| FGRRES_04525   | FGSG_04525 | FGSG_04525 | 2.70 |         |      | p-loop containing nucleoside triphosphate hydrolase                                                                                                                                                                                                                            |
| FGRRES_15691   | FGSG_00123 | FGSG_00123 | 2.71 |         |      | ankyrin repeat protein                                                                                                                                                                                                                                                         |
| FGRRES_08263   | FGSG_08263 | FGSG_08263 | 2.72 |         |      | domain protein                                                                                                                                                                                                                                                                 |
| FGRRES_02556   | FGSG_02556 | FGSG_02556 | 2.72 |         |      | uncharacterized protein y057_2886                                                                                                                                                                                                                                              |
| FGRRES_03163   | FGSG_03163 | FGSG_03163 | 2.73 |         |      | flavin-binding monooxygenase                                                                                                                                                                                                                                                   |
| FGRRES_16357   | FGSG_02984 | FGSG_02984 | 2.76 |         |      | phosphoethanolamine n-methyltransferase 3                                                                                                                                                                                                                                      |
| FGRRES_13367   | FGSG_13367 | FGSG_13367 | 2.76 |         |      | uncharacterized protein ffuj_06075                                                                                                                                                                                                                                             |
| FGRRES_07847   | FGSG_07847 | FGSG_07847 | 2.78 |         |      | group protein                                                                                                                                                                                                                                                                  |
| FGRRES_04640   | FGSG_04640 | FGSG_04640 | 2.79 |         |      | hsp70 protein                                                                                                                                                                                                                                                                  |
| FGRRES_10728   | FGSG_10728 | FGSG_10728 | 2.79 | YGR225W | AMA1 | activator of meiotic anaphase promoting complex (APC/C); Cdc20p family member; required for initiation of spore wall assembly; required for Clb1p degradation during meiosis; prevents premature assembly of the meiosis I spindle, required for DSB induced prophase I arrest |
| FGRRES_00220   | FGSG_00220 | FGSG_00220 | 2.79 |         |      | sodium-dependent serotonin transporter                                                                                                                                                                                                                                         |
| FGRRES_17243   | FGSG_09605 | FGSG_09605 | 2.84 |         |      | uncharacterized protein lw93_14006                                                                                                                                                                                                                                             |

|                |            |            |      |                                                                |
|----------------|------------|------------|------|----------------------------------------------------------------|
| FGRRES_09175   | FGSG_09175 | FGSG_09175 | 2.84 | hypothetical protein FGSG_09175<br>[Fusarium graminearum PH-1] |
| FGRRES_03883   | FGSG_03883 | FGSG_03883 | 2.85 | uncharacterized protein ffuj_11288                             |
| FGRRES_17678   | FGSG_05820 | FGSG_05820 | 2.85 | related to methyltransferase                                   |
| FGRRES_03822   | FGSG_03822 | FGSG_03822 | 2.87 | uncharacterized protein lw93_6876                              |
| FGRRES_07596   | FGSG_07596 | FGSG_07596 | 2.89 | uncharacterized protein y057_4894                              |
| FGRRES_09082   | FGSG_09082 | FGSG_09082 | 2.89 | glucan -alpha-glucosidase                                      |
| FGRRES_17502_M | FGSG_13897 | FGSG_13897 | 2.90 | amino-acid permease inda1                                      |
| FGRRES_11324   | FGSG_11324 | FGSG_11324 | 2.91 | ring finger protein 43                                         |
| FGRRES_10154   | FGSG_10154 | FGSG_10154 | 2.91 | uncharacterized protein lw93_13847                             |
| FGRRES_03072   | FGSG_03072 | FGSG_03072 | 2.91 | tripeptidyl-peptidase i                                        |
| FGRRES_12503   | FGSG_12503 | FGSG_12503 | 2.95 | uncharacterized protein y057_5082                              |
| FGRRES_17585   | FGSG_11245 | FGSG_11245 | 3.00 | uncharacterized protein ffuj_14339                             |
| FGRRES_08925   | FGSG_08925 | FGSG_08925 | 3.01 | f-box domain-containing protein                                |
| FGRRES_05945   | FGSG_05945 | FGSG_05945 | 3.03 | hypothetical protein FGSG_05945<br>[Fusarium graminearum PH-1] |
| FGRRES_15690   | FGSG_00121 | FGSG_00121 | 3.10 | intracellular serine protease                                  |
| FGRRES_00122   | FGSG_00122 | FGSG_00122 | 3.10 | intracellular serine protease                                  |
| FGRRES_04803   | FGSG_04803 | FGSG_04803 | 3.10 | c6 transcription factor                                        |
| FGRRES_11233   | FGSG_11233 | FGSG_11233 | 3.10 | uncharacterized protein ffuj_14866                             |
| FGRRES_07448   | FGSG_07448 | FGSG_07448 | 3.14 | uncharacterized protein y057_11785                             |
| FGRRES_06192   | FGSG_06192 | FGSG_06192 | 3.14 | uncharacterized protein lw93_10823                             |
| FGRRES_12132   | FGSG_12132 | FGSG_12132 | 3.18 | serine threonine protein kinase                                |
| FGRRES_07734   | FGSG_07734 | FGSG_07734 | 3.19 | hypothetical protein FGSG_07734<br>[Fusarium graminearum PH-1] |
| FGRRES_16623   | FGSG_06238 | FGSG_06238 | 3.20 | chitinase                                                      |
| FGRRES_06199   | FGSG_06199 | FGSG_06199 | 3.22 | trans-aconitate 2-methyltransferase                            |
| FGRRES_11509   | FGSG_11509 | FGSG_11509 | 3.23 | uncharacterized protein lw93_10044                             |



|              |            |            |      |                                            |
|--------------|------------|------------|------|--------------------------------------------|
| FGRRES_15993 | FGSG_02430 | FGSG_02430 | 3.23 | uncharacterized protein ffuj_14028         |
| FGRRES_16887 | FGSG_07735 | FGSG_07735 | 3.27 | nacht domain-containing protein            |
| FGRRES_09727 | FGSG_09727 | FGSG_09727 | 3.27 | hypothetical protein FGSG_09727            |
|              |            |            |      | [Fusarium graminearum PH-1]                |
| FGRRES_13902 | FGSG_13902 | FGSG_13902 | 3.28 | hypothetical protein FGSG_13902            |
|              |            |            |      | [Fusarium graminearum PH-1]                |
| FGRRES_15936 | FGSG_02129 | FGSG_02129 | 3.39 | nacht domain protein                       |
| FGRRES_11190 | FGSG_11190 | FGSG_11190 | 3.39 | guanyl-specific ribonuclease fl            |
| FGRRES_02130 | FGSG_02130 | FGSG_02130 | 3.40 | nfx1-type zinc finger-containing protein 1 |
| FGRRES_02266 | FGSG_02266 | FGSG_02266 | 3.41 | short-chain alcohol dehydrogenase          |
| FGRRES_13083 | FGSG_13083 | FGSG_13083 | 3.42 | hypothetical protein FGSG_13083            |
|              |            |            |      | [Fusarium graminearum PH-1]                |
| FGRRES_08196 | FGSG_08196 | FGSG_08196 | 3.45 | peptidase a4 family protein                |
| FGRRES_11103 | FGSG_11103 | FGSG_11103 | 3.45 | aat family amino acid transporter          |
| FGRRES_16905 | FGSG_07817 | FGSG_07817 | 3.45 | uncharacterized protein ffuj_11405         |
| FGRRES_00799 | FGSG_00799 | FGSG_00799 | 3.49 | structure-specific endonuclease subunit    |
|              |            |            |      | slx4                                       |
| FGRRES_15987 | FGSG_02410 | FGSG_02410 | 3.53 | uncharacterized protein lw93_14927         |
| FGRRES_16275 | FGSG_03407 | FGSG_03407 | 3.55 | neutral amino acid permease protein        |
| FGRRES_04490 | FGSG_04490 | FGSG_04490 | 3.56 | uncharacterized protein ffuj_03572         |
| FGRRES_17089 | FGSG_08170 | FGSG_08170 | 3.61 | d-amino acid oxidase                       |
| FGRRES_06303 | FGSG_06303 | FGSG_06303 | 3.66 | uncharacterized protein ffuj_13540         |
| FGRRES_09501 | FGSG_09501 | FGSG_09501 | 3.74 | uncharacterized protein lw93_14115         |
| FGRRES_15856 | FGSG_01507 | FGSG_01507 | 3.78 | uncharacterized protein lw93_11529         |
| FGRRES_11105 | FGSG_11105 | FGSG_11105 | 3.80 | heat shock 70 kda protein 12b              |
| FGRRES_02131 | FGSG_02131 | FGSG_02131 | 3.82 | uncharacterized protein lw94_1599          |
| FGRRES_07772 | FGSG_07772 | FGSG_07772 | 3.82 | hypothetical protein FGSG_07772            |
|              |            |            |      | [Fusarium graminearum PH-1]                |

|                |            |            |      |                                                                 |
|----------------|------------|------------|------|-----------------------------------------------------------------|
| FGRRES_13849   | FGSG_13849 | FGSG_13849 | 3.83 | uncharacterized protein ffuj_08417                              |
| FGRRES_03340   | FGSG_03340 | FGSG_03340 | 3.83 | polyketide synthase                                             |
| FGRRES_09412   | FGSG_09412 | FGSG_09412 | 3.84 | uncharacterized protein ffuj_04249                              |
| FGRRES_17477   | FGSG_11102 | FGSG_11102 | 3.86 | hypothetical protein FG05_11102<br>[Fusarium graminearum]       |
| FGRRES_02354   | FGSG_02354 | FGSG_02354 | 3.87 | chitinase                                                       |
| FGRRES_17306   | FGSG_10047 | FGSG_10047 | 3.91 | uncharacterized protein ffuj_07399                              |
| FGRRES_07543   | FGSG_07543 | FGSG_07543 | 3.92 | sugar transport protein stp1                                    |
| FGRRES_11992   | FGSG_11992 | FGSG_11992 | 3.93 | udpglucose 4-epimerase                                          |
| FGRRES_09821   | FGSG_09821 | FGSG_09821 | 3.98 | glycoside hydrolase family 43                                   |
| FGRRES_07497   | FGSG_07497 | FGSG_07497 | 4.03 | uncharacterized protein lw93_7934                               |
| FGRRES_00313   | FGSG_00313 | FGSG_00313 | 4.05 | upc2-regulatory protein involved in control<br>of sterol uptake |
| FGRRES_13203   | FGSG_13203 | FGSG_13203 | 4.08 | regulator of nonsense transcripts 1 like<br>protein             |
| FGRRES_13573   | FGSG_13573 | FGSG_13573 | 4.08 | hypothetical protein FGSG_13573<br>[Fusarium graminearum PH-1]  |
| FGRRES_13917   | FGSG_13917 | FGSG_13917 | 4.11 | hypothetical protein FGSG_13917<br>[Fusarium graminearum PH-1]  |
| FGRRES_04870   | FGSG_04870 | FGSG_04870 | 4.11 | uncharacterized protein ffuj_08255                              |
| FGRRES_15901   | FGSG_01869 | FGSG_01869 | 4.25 | uncharacterized protein lw93_5916                               |
| FGRRES_07757   | FGSG_07757 | FGSG_07757 | 4.25 | integral membrane protein pth11                                 |
| FGRRES_07843   | FGSG_07843 | FGSG_07843 | 4.26 | uncharacterized protein ffuj_12402                              |
| FGRRES_13987_M | FGSG_13987 | FGSG_13987 | 4.28 | myosin light chain smooth muscle                                |
| FGRRES_07899   | FGSG_07899 | FGSG_07899 | 4.28 | uncharacterized protein ffuj_13596                              |
| FGRRES_02074   | FGSG_02074 | FGSG_02074 | 4.31 | hypothetical protein FGSG_02074<br>[Fusarium graminearum PH-1]  |
| FGRRES_16195   | FGSG_03821 | FGSG_03821 | 4.32 | mrna 3'-end-processing protein yth1                             |

|                |            |            |      |         |      |                                                                                                                                                                                                     |
|----------------|------------|------------|------|---------|------|-----------------------------------------------------------------------------------------------------------------------------------------------------------------------------------------------------|
| FGRRES_11299   | FGSG_11299 | FGSG_11299 | 4.36 |         |      | sterigmatocystin biosynthesis lipase ester-ase stci                                                                                                                                                 |
| FGRRES_08156   | FGSG_08156 | FGSG_08156 | 4.38 |         |      | integral membrane protein                                                                                                                                                                           |
| FGRRES_00046   | FGSG_00046 | FGSG_00046 | 4.39 |         |      | multidrug resistance protein                                                                                                                                                                        |
|                |            |            |      |         |      | Arginosuccinate synthe-<br>tase; catalyzes the for-<br>mation of L-arginosuc-<br>cinate from citrulline and<br>L-aspartate in the arginine<br>biosynthesis pathway; po-<br>tential Cdc28p substrate |
| FGRRES_06098_M | FGSG_06098 | FGSG_06098 | 4.39 | YOL058W | ARG1 | argininosuccinate synthase                                                                                                                                                                          |
| FGRRES_02285   | FGSG_02285 | FGSG_02285 | 4.40 |         |      | isoflavone reductase like protein                                                                                                                                                                   |
| FGRRES_09752   | FGSG_09752 | FGSG_09752 | 4.42 |         |      | uncharacterized protein lw93_10612                                                                                                                                                                  |
| FGRRES_07386   | FGSG_07386 | FGSG_07386 | 4.44 |         |      | uncharacterized protein ffuj_02527                                                                                                                                                                  |
| FGRRES_07894   | FGSG_07894 | FGSG_07894 | 4.46 |         |      | phosphate:h <sup>+</sup> symporter                                                                                                                                                                  |
| FGRRES_13289   | FGSG_13289 | FGSG_13289 | 4.46 |         |      | hypothetical protein FGSG_13289<br>[Fusarium graminearum PH-1]                                                                                                                                      |
| FGRRES_04512   | FGSG_04512 | FGSG_04512 | 4.52 |         |      | sodium potassium-transporting atpase sub-<br>unit alpha                                                                                                                                             |
| FGRRES_02139   | FGSG_02139 | FGSG_02139 | 4.55 |         |      | canalicular multispecific organic anion<br>transporter 2                                                                                                                                            |
| FGRRES_08264   | FGSG_08264 | FGSG_08264 | 4.62 |         |      | mg <sup>2+</sup> transporter zinc transport protein                                                                                                                                                 |
| FGRRES_16560   | FGSG_05866 | FGSG_05866 | 4.63 |         |      | serine threonine protein kinase                                                                                                                                                                     |
| FGRRES_09827_M | FGSG_09827 | FGSG_09827 | 4.65 |         |      | uncharacterized protein ffuj_04670                                                                                                                                                                  |
| FGRRES_02414   | FGSG_02414 | FGSG_02414 | 4.67 |         |      | uncharacterized protein ffuj_00134                                                                                                                                                                  |
| FGRRES_00036   | FGSG_00036 | FGSG_00036 | 4.71 | YPL231W | FAS2 | Alpha subunit of fatty acid<br>synthetase; complex cata-<br>lyzes the synthesis of long-<br>acyl transferase acyl hydrolase lysophos-<br>pholipase                                                  |

|              |            |            |      |                                                                                                                                                                                   |
|--------------|------------|------------|------|-----------------------------------------------------------------------------------------------------------------------------------------------------------------------------------|
|              |            |            |      | chain saturated fatty acids;<br>contains the acyl-carrier<br>protein domain and beta-<br>ketoacyl reductase, beta-<br>ketoacyl synthase and self-<br>pantetheinylation activities |
| FGRRES_13901 | FGSG_13901 | FGSG_13901 | 4.73 | hypothetical protein FGSG_13901<br>[Fusarium graminearum PH-1]                                                                                                                    |
| FGRRES_08616 | FGSG_08616 | FGSG_08616 | 4.75 | hypothetical protein FGSG_08616<br>[Fusarium graminearum PH-1]                                                                                                                    |
| FGRRES_11993 | FGSG_11993 | FGSG_11993 | 4.82 | uncharacterized protein y057_14791                                                                                                                                                |
| FGRRES_03165 | FGSG_03165 | FGSG_03165 | 4.95 | ethanolamine utilization protein                                                                                                                                                  |
| FGRRES_07844 | FGSG_07844 | FGSG_07844 | 5.05 | hypothetical protein FGSG_07844<br>[Fusarium graminearum PH-1]                                                                                                                    |
| FGRRES_03834 | FGSG_03834 | FGSG_03834 | 5.12 | low-affinity potassium transport protein                                                                                                                                          |
| FGRRES_17372 | FGSG_10471 | FGSG_10471 | 5.19 | helicase-like transcription factor protein                                                                                                                                        |
| FGRRES_16893 | FGSG_07776 | FGSG_07776 | 5.21 | arsenite efflux transporter -like                                                                                                                                                 |
| FGRRES_12570 | FGSG_12570 | FGSG_12570 | 5.33 | gnat family protein                                                                                                                                                               |
| FGRRES_11298 | FGSG_11298 | FGSG_11298 | 5.34 | fad-containing monooxygenase                                                                                                                                                      |
| FGRRES_11371 | FGSG_11371 | FGSG_11371 | 5.44 | hypothetical protein FGSG_11371<br>[Fusarium graminearum PH-1]                                                                                                                    |
| FGRRES_04766 | FGSG_04766 | FGSG_04766 | 5.45 | hypothetical protein FGSG_04766<br>[Fusarium graminearum PH-1]                                                                                                                    |
| FGRRES_15807 | FGSG_00963 | FGSG_00963 | 5.48 | uncharacterized protein ffuj_00641                                                                                                                                                |
| FGRRES_03414 | FGSG_03414 | FGSG_03414 | 5.53 | dimethylglycine mitochondrial precursor                                                                                                                                           |
| FGRRES_16588 | FGSG_06013 | FGSG_06013 | 5.54 | ring finger domain-containing protein                                                                                                                                             |
| FGRRES_13977 | FGSG_13977 | FGSG_13977 | 5.57 | hypothetical protein FGSG_13977<br>[Fusarium graminearum PH-1]                                                                                                                    |

|                |                           |                       |      |                                                                |
|----------------|---------------------------|-----------------------|------|----------------------------------------------------------------|
| FGRRES_11104   | FGSG_11104                | FGSG_11104            | 5.69 | triacylglycerol lipase ii precursor                            |
| FGRRES_11362   | FGSG_11362                | FGSG_11362            | 5.74 | uncharacterized protein ffuj_00281                             |
| FGRRES_04596   | FGSG_04596                | FGSG_04596            | 5.79 | o-methyl transferase partial                                   |
| FGRRES_04519   | FGSG_04519                | FGSG_04519            | 5.85 | uncharacterized protein lw93_3464                              |
| FGRRES_03859   | FGSG_03859                | FGSG_03859            | 5.87 | hypothetical protein FGSG_03859<br>[Fusarium graminearum PH-1] |
| FGRRES_16194   | FGSG_03823                | FGSG_03823            | 5.90 | integral membrane protein                                      |
| FGRRES_10143   | FGSG_10143                | FGSG_10143            | 5.96 | hexamer-binding protein hexbp                                  |
| FGRRES_16894   | FGSG_07777                | FGSG_07777            | 5.99 | uncharacterized protein ffuj_14757                             |
| FGRRES_06015   | FGSG_06015                | FGSG_06015            | 6.20 | hypothetical protein FGSG_06015<br>[Fusarium graminearum PH-1] |
| FGRRES_07813   | FGSG_07813                | FGSG_07813            | 6.30 | hypothetical protein FGSG_07813<br>[Fusarium graminearum PH-1] |
| FGRRES_03416_M | FGSG_03416                | FGSG_03416            | 6.40 | fad dependent oxidoreductase                                   |
| FGRRES_09268   | FGSG_09268                | FGSG_09268            | 6.55 | uncharacterized protein ffuj_04143                             |
| FGRRES_12977   | FGSG_12977                | FGSG_12977            | 6.59 | mfs monocarboxylate transporter                                |
| FGRRES_16073   | FGSG_11631                | FGSG_11631            | 6.63 | mfs allantate transporter                                      |
| FGRRES_16631   | FGSG_06304                | FGSG_06304            | 6.65 | hsp70 protein                                                  |
| FGRRES_04923   | FGSG_04923                | FGSG_04923            | 7.16 | g-protein coupled receptor protein                             |
| FGRRES_05620   | FGSG_05620                | FGSG_05620            | 7.21 | upf0145 domain-containing protein                              |
| FGRRES_16300_M | FGSG_12474,F<br>GSG_12475 | FGSG_12474,FGSG_12475 | 7.39 | integral membrane protein                                      |
| FGRRES_03972   | FGSG_03972                | FGSG_03972            | 7.51 | isoamyl alcohol oxidase                                        |
| FGRRES_04798   | FGSG_04798                | FGSG_04798            | 7.62 | uncharacterized protein ffuj_11304                             |
| FGRRES_06014   | FGSG_06014                | FGSG_06014            | 7.68 | hsp70-like protein                                             |
| FGRRES_07997   | FGSG_07997                | FGSG_07997            | 7.86 | uncharacterized protein lw94_10223                             |
| FGRRES_16108   | FGSG_04466                | FGSG_04466            | 7.98 | ankyrin repeat protein                                         |
| FGRRES_16012   | FGSG_02548                | FGSG_02548            | 8.24 | uncharacterized protein y057_4303                              |

|                |                           |                       |       |                                                                |
|----------------|---------------------------|-----------------------|-------|----------------------------------------------------------------|
| FGRRES_16930   | FGSG_07934                | FGSG_07934            | 8.34  | uncharacterized protein y057_3068                              |
| FGRRES_03460   | FGSG_03460                | FGSG_03460            | 8.52  | peptide transporter                                            |
| FGRRES_04871   | FGSG_04871                | FGSG_04871            | 8.79  | conserved plasmodium protein                                   |
| FGRRES_04689_M | FGSG_04690                | FGSG_04690            | 8.80  | uncharacterized protein lw93_10970                             |
| FGRRES_08343   | FGSG_08343                | FGSG_08343            | 9.34  | h <sup>+</sup> -transporting atpase                            |
| FGRRES_10470   | FGSG_10470                | FGSG_10470            | 9.47  | early growth response protein 1-b                              |
| FGRRES_08139   | FGSG_08139                | FGSG_08139            | 9.50  | hypothetical protein FGSG_08139<br>[Fusarium graminearum PH-1] |
| FGRRES_00348   | FGSG_00348                | FGSG_00348            | 9.60  | argonaute like protein                                         |
| FGRRES_17094   | FGSG_08151                | FGSG_08151            | 9.70  | feebly like protein                                            |
| FGRRES_17387   | FGSG_10548                | FGSG_10548            | 9.72  | polyketide synthase                                            |
| FGRRES_16372   | FGSG_02897                | FGSG_02897            | 9.80  | unnamed protein product [Fusarium graminearum]                 |
| FGRRES_01559   | FGSG_01559                | FGSG_01559            | 10.24 | serine threonine protein kinase                                |
| FGRRES_15837   | FGSG_11919,F<br>GSG_11920 | FGSG_11919,FGSG_11920 | 10.34 | ankyrin repeat and ibr domain-containing<br>protein 1          |
| FGRRES_02318   | FGSG_02318                | FGSG_02318            | 10.48 | kinesin light chain                                            |
| FGRRES_07973   | FGSG_07973                | FGSG_07973            | 10.54 | uncharacterized protein y057_6743                              |
| FGRRES_09224   | FGSG_09224                | FGSG_09224            | 10.74 | uncharacterized protein ffuj_04185                             |
| FGRRES_16678   | FGSG_06559                | FGSG_06559            | 10.95 | uncharacterized protein lw93_14219                             |
| FGRRES_01780   | FGSG_01780                | FGSG_01780            | 10.99 | hypothetical protein FGSG_01780<br>[Fusarium graminearum PH-1] |
| FGRRES_16903   | FGSG_07814                | FGSG_07814            | 11.15 | high-affinity methionine permease                              |
| FGRRES_09151_M | FGSG_09151                | FGSG_09151            | 11.85 | mg <sup>2+</sup> transporter -like zinc transport protein      |
| FGRRES_05345   | FGSG_05345                | FGSG_05345            | 11.86 |                                                                |
| FGRRES_13525   | FGSG_13525                | FGSG_13525            | 11.93 | uncharacterized protein ffuj_03966                             |

|                |            |            |       |         |      |                                                                                                                                                                                                                                    |
|----------------|------------|------------|-------|---------|------|------------------------------------------------------------------------------------------------------------------------------------------------------------------------------------------------------------------------------------|
| FGRRES_17479   | FGSG_11096 | FGSG_11096 | 12.27 |         |      | unnamed protein product [Fusarium graminearum]                                                                                                                                                                                     |
| FGRRES_04646_M | FGSG_04646 | FGSG_04646 | 12.65 |         |      | unnamed protein product [Fusarium graminearum]                                                                                                                                                                                     |
| FGRRES_09095   | FGSG_09095 | FGSG_09095 | 13.04 |         |      | uncharacterized protein lw93_3439                                                                                                                                                                                                  |
| FGRRES_04175   | FGSG_04175 | FGSG_04175 | 13.49 |         |      | uncharacterized protein ffuj_09621                                                                                                                                                                                                 |
| FGRRES_09441   | FGSG_09441 | FGSG_09441 | 13.55 |         |      | uncharacterized protein lw93_14176                                                                                                                                                                                                 |
|                | FGSG_11656 | FGSG_11656 | 13.67 | YKL182W | FAS1 | Beta subunit of fatty acid synthetase; complex catalyzes the synthesis of long-chain saturated fatty acids; contains acetyltransacylase, dehydratase, enoyl reductase, malonyl transacylase, and palmitoyl transacylase activities |
| FGRRES_11656   |            |            |       |         |      | fatty acid synthase subunit fungi type                                                                                                                                                                                             |
| FGRRES_12078   | FGSG_12078 | FGSG_12078 | 13.76 |         |      | litaf-like zinc finger domain-containing protein                                                                                                                                                                                   |
| FGRRES_12902_M | FGSG_12902 | FGSG_12902 | 14.13 |         |      | uncharacterized protein ffuj_13539                                                                                                                                                                                                 |
| FGRRES_04174   | FGSG_04174 | FGSG_04174 | 17.19 |         |      | uncharacterized protein lw93_13222                                                                                                                                                                                                 |
| FGRRES_06728   | FGSG_06728 | FGSG_06728 | 17.94 |         |      | uncharacterized protein ffuj_03255                                                                                                                                                                                                 |
| FGRRES_08246_M | FGSG_08246 | FGSG_08246 | 18.88 |         |      | zinc c2h2-type dna-binding partial                                                                                                                                                                                                 |
| FGRRES_04465_M | FGSG_04465 | FGSG_04465 | 18.97 |         |      | sugar transporter                                                                                                                                                                                                                  |
| FGRRES_01705   | FGSG_01705 | FGSG_01705 | 19.17 |         |      | flotillin                                                                                                                                                                                                                          |
| FGRRES_13411   | FGSG_13411 | FGSG_13411 | 19.76 |         |      | hypothetical protein FGSG_13411 [Fusarium graminearum PH-1]                                                                                                                                                                        |
| FGRRES_03825   | FGSG_03825 | FGSG_03825 | 19.81 |         |      | large-conductance mechanosensitive channel                                                                                                                                                                                         |

|                |            |            |        |                                                                 |
|----------------|------------|------------|--------|-----------------------------------------------------------------|
| FGRRES_20172   | FGSG_12438 | FGSG_12438 | 20.45  | cytochrome p450 oxidoreductase                                  |
| FGRRES_00351_M | FGSG_00351 | FGSG_00351 | 22.28  | uncharacterized protein lw94_2250                               |
| FGRRES_09463   | FGSG_09463 | FGSG_09463 | 23.40  | rtm1-like protein                                               |
| FGRRES_04802   | FGSG_04802 | FGSG_04802 | 23.52  | heterokaryon incompatibility protein                            |
| FGRRES_07496_M | FGSG_07496 | FGSG_07496 | 23.58  | high-affinity methionine permease                               |
| FGRRES_10542   | FGSG_10542 | FGSG_10542 | 26.01  | uncharacterized protein ffuj_09281                              |
| FGRRES_10350   | FGSG_10350 | FGSG_10350 | 27.57  | uncharacterized protein ffuj_07096                              |
| FGRRES_01752   | FGSG_01752 | FGSG_01752 | 27.93  | hypothetical protein FGSG_01752<br>[Fusarium graminearum PH-1]  |
| FGRRES_00049   | FGSG_00049 | FGSG_00049 | 30.13  | branched-chain amino acid aminotransferase                      |
| FGRRES_03197   | FGSG_03197 | FGSG_03197 | 31.35  | uncharacterized protein lw94_8739                               |
| FGRRES_17032   | FGSG_08450 | FGSG_08450 | 31.92  | uncharacterized protein ffuj_06061                              |
| FGRRES_16234   | FGSG_03608 | FGSG_03608 | 33.20  | pathogenicity protein                                           |
| FGRRES_00258   | FGSG_00258 | FGSG_00258 | 33.58  | uncharacterized protein lw93_2879                               |
| FGRRES_13756   | FGSG_13756 | FGSG_13756 | 34.40  | hydrolase or acyltransferase (alpha beta hydrolase superfamily) |
| FGRRES_16310   | FGSG_03198 | FGSG_03198 | 34.90  | uncharacterized protein lw93_4980                               |
| FGRRES_03516   | FGSG_03516 | FGSG_03516 | 35.17  | neutral amino acid permease                                     |
| FGRRES_02468_M | FGSG_02468 | FGSG_02468 | 37.73  | uncharacterized protein ffuj_07794                              |
| FGRRES_17165   | FGSG_09152 | FGSG_09152 | 38.35  | amino acid transporter                                          |
| FGRRES_00312   | FGSG_00312 | FGSG_00312 | 62.59  | uncharacterized protein ffuj_00814                              |
| FGRRES_08169   | FGSG_08169 | FGSG_08169 | 67.00  | high-affinity methionine permease                               |
| FGRRES_12209_M | FGSG_12209 | FGSG_12209 | 69.33  | hypothetical protein FG05_12209<br>[Fusarium graminearum]       |
| FGRRES_16935   | FGSG_07968 | FGSG_07968 | 102.42 | related to rtm1p                                                |
| FGRRES_05521   | FGSG_05521 | FGSG_05521 | 336.16 | uncharacterized protein ffuj_08656                              |



**Table S3.** Genes down-regulated in the Fgsf1 mutant in comparison with the wild type.

| Gene ID        | MIPS ID    | Broad ID   | Gene Name <sup>†</sup> | Fold   | Yeast_Top_Homolog (<1E-5) <sup>‡</sup> |            | Yeast_Description | NR Hits <sup>§</sup>                     |
|----------------|------------|------------|------------------------|--------|----------------------------------------|------------|-------------------|------------------------------------------|
|                |            |            |                        | Change | Yeast_ID                               | Yeast_Gene |                   |                                          |
| FGRRES_04548   | FGSG_04548 | FGSG_04548 |                        | 1.98   |                                        |            |                   | uncharacterized protein ffuj_10063       |
| FGRRES_05940   | FGSG_05940 | FGSG_05940 |                        | 1.98   |                                        |            |                   | tob3 (member of aaa-atpase family)       |
| FGRRES_13947   | FGSG_13947 | FGSG_13947 |                        | 1.99   |                                        |            |                   | cell wall glycoprotein                   |
| FGRRES_04881_M | FGSG_04881 | FGSG_04881 |                        | 1.99   |                                        |            |                   | cysteine-rich tm module stress tolerance |
| FGRRES_06993   | FGSG_06993 | FGSG_06993 |                        | 1.99   |                                        |            |                   | secreted protein                         |
| FGRRES_02828   | FGSG_02828 | FGSG_02828 |                        | 2.01   |                                        |            |                   | uncharacterized protein lw93_4081        |
| FGRRES_07160   | FGSG_07160 | FGSG_07160 |                        | 2.02   |                                        |            |                   | uncharacterized protein ffuj_02682       |

|                |            |            |      |         |       |                                                                                                                                                                                                               |                                    |
|----------------|------------|------------|------|---------|-------|---------------------------------------------------------------------------------------------------------------------------------------------------------------------------------------------------------------|------------------------------------|
| FGRRES_10613   | FGSG_10613 | FGSG_10613 | 2.04 |         |       |                                                                                                                                                                                                               | family protein                     |
| FGRRES_03846   | FGSG_03846 | FGSG_03846 | 2.04 |         |       |                                                                                                                                                                                                               | lipase 4                           |
| FGRRES_11079_M | FGSG_11079 | FGSG_11079 | 2.04 | YLR004C | THI73 | Putative plasma membrane permease; proposed to be involved in carboxylic acid uptake and repressed by thiamine; substrate of Dbf2p/Mob1p kinase; transcription is altered if mitochondrial dysfunction occurs | allantoate permease                |
| FGRRES_13569   | FGSG_13569 | FGSG_13569 | 2.05 |         |       |                                                                                                                                                                                                               | uncharacterized protein ffuj_04257 |
| FGRRES_03585   | FGSG_03585 | FGSG_03585 | 2.05 |         |       |                                                                                                                                                                                                               | uncharacterized protein ffuj_10514 |
| FGRRES_05839   | FGSG_05839 | FGSG_05839 | 2.05 | YDR536W | STL1  | Glycerol proton symporter of the plasma membrane; subject to glucose-induced inactivation, strongly but transiently induced when cells are subjected to osmotic shock                                         | sugar transporter stl1             |
| FGRRES_07478   | FGSG_07478 | FGSG_07478 | 2.06 |         |       |                                                                                                                                                                                                               | uncharacterized protein ffuj_02443 |
| FGRRES_10300   | FGSG_10300 | FGSG_10300 | 2.07 |         |       |                                                                                                                                                                                                               | uncharacterized protein ffuj_07148 |
| FGRRES_08061_M | FGSG_08601 | FGSG_08601 | 2.07 | YKR097W | PCK1  | Phosphoenolpyruvate carboxykinase; key enzyme in                                                                                                                                                              | phosphoenolpyruvate carboxykinase  |

|                      |                       |                       |      |         |       |                                                                                                                                                                                                |
|----------------------|-----------------------|-----------------------|------|---------|-------|------------------------------------------------------------------------------------------------------------------------------------------------------------------------------------------------|
|                      |                       |                       |      |         |       | gluconeogenesis, catalyzes early reaction in carbohydrate biosynthesis, glucose represses transcription and accelerates mRNA degradation, regulated by Mcm1p and Cat8p, located in the cytosol |
| FGRRES_07821         | FGSG_07821            | FGSG_07821            | 2.08 |         |       | uncharacterized protein lw93_12094                                                                                                                                                             |
| FGRRES_11988         | FGSG_11988            | FGSG_11988            | 2.08 |         |       | abc multidrug                                                                                                                                                                                  |
| FGRRES_03946         | FGSG_03946            | FGSG_03946            | 2.09 |         |       | thioredoxin                                                                                                                                                                                    |
| FGRRES_04760_M       | FGSG_04760            | FGSG_04760            | 2.10 |         |       | hypothetical protein FGSG_04760<br>[Fusarium graminearum PH-1]                                                                                                                                 |
| FGRRES_10608         | FGSG_10608            | FGSG_10608            | 2.10 |         |       | short-chain dehydrogenase reductase family protein                                                                                                                                             |
| FGRRES_16777         | FGSG_07097            | FGSG_07097            | 2.11 |         |       | uncharacterized protein lw93_7447                                                                                                                                                              |
| FGRRES_09170         | FGSG_09170            | FGSG_09170            | 2.12 |         |       | uncharacterized protein ffuj_14296                                                                                                                                                             |
| FGRRES_00858         | FGSG_00858            | FGSG_00858            | 2.13 |         |       | uncharacterized protein y057_9795                                                                                                                                                              |
| FGRRES_05908         | FGSG_05908            | FGSG_05908            | 2.13 |         |       | rbtmx2 protein                                                                                                                                                                                 |
| FGRRES_13106_16799_M | FGSG_13106,FGSG_13107 | FGSG_13106,FGSG_13107 | 2.15 |         |       | uncharacterized protein ffuj_03191                                                                                                                                                             |
| FGRRES_09146_M       | FGSG_09146            | FGSG_09146            | 2.15 |         |       | ankyrin repeat and socs box protein 7                                                                                                                                                          |
| FGRRES_09889         | FGSG_09889            | FGSG_09889            | 2.16 |         |       | uncharacterized protein ffuj_07572                                                                                                                                                             |
| FGRRES_01496         | FGSG_01496            | FGSG_01496            | 2.16 |         |       | choline-sulfatase                                                                                                                                                                              |
| FGRRES_08687         | FGSG_08687            | FGSG_08687            | 2.16 |         |       | uncharacterized protein ffuj_06200                                                                                                                                                             |
| FGRRES_01330         | FGSG_01330            | FGSG_01330            | 2.18 | YER182W | FMP10 | Putative protein of unknown function; the authentic, non-tagged thioesterase family protein                                                                                                    |

|                |                       |                       |      | protein is detected in highly purified mitochondria in high-throughput studies |
|----------------|-----------------------|-----------------------|------|--------------------------------------------------------------------------------|
| FGRRES_05291   | FGSG_05291            | FGSG_05291            | 2.19 | sur7 protein                                                                   |
| FGRRES_07588   | FGSG_07588            | FGSG_07588            | 2.19 | hypothetical protein FGSG_07588 [Fusarium graminearum PH-1]                    |
| FGRRES_16462   | FGSG_05209            | FGSG_05209            | 2.19 | t-complex protein 11                                                           |
| FGRRES_17058   | FGSG_08308            | FGSG_08308            | 2.20 | multidrug resistance protein                                                   |
| FGRRES_01681   | FGSG_01681            | FGSG_01681            | 2.20 | atp-grasp domain protein                                                       |
| FGRRES_06612   | FGSG_06612            | FGSG_06612            | 2.20 | oxalate decarboxylase                                                          |
| FGRRES_03591   | FGSG_03591            | FGSG_03591            | 2.22 | chitinase 1                                                                    |
| FGRRES_16060   | FGSG_11565            | FGSG_11565            | 2.24 | alkanesulfonate monooxygenase                                                  |
| FGRRES_16301   | FGSG_03266            | FGSG_03266            | 2.25 | uncharacterized protein ffuj_10888                                             |
| FGRRES_00016_M | FGSG_00016            | FGSG_00016            | 2.25 | unnamed protein product [Fusarium graminearum]                                 |
| FGRRES_10609   | FGSG_10609            | FGSG_10609            | 2.25 | fad linked oxidase-like protein                                                |
| FGRRES_08210   | FGSG_08210            | FGSG_08210            | 2.26 | hypothetical protein FGSG_08210 [Fusarium graminearum PH-1]                    |
| FGRRES_03244   | FGSG_03244            | FGSG_03244            | 2.27 | enoyl- hydratase                                                               |
| FGRRES_10230   | FGSG_10230            | FGSG_10230            | 2.28 | 4-coumarate-- ligase                                                           |
| FGRRES_00162   | FGSG_00162            | FGSG_00162            | 2.28 | family oxidoreductase                                                          |
| FGRRES_12862   | FGSG_12862            | FGSG_12862            | 2.28 | tubulin folding cofactor c                                                     |
| FGRRES_16442   | FGSG_04903            | FGSG_04903            | 2.29 | cytochrome-b5 reductase                                                        |
| FGRRES_00531   | FGSG_00531            | FGSG_00531            | 2.30 | family oxidoreductase                                                          |
| FGRRES_16924   | FGSG_07904            | FGSG_07904            | 2.32 | alternative sulfate transporter                                                |
| FGRRES_00470   | FGSG_00470            | FGSG_00470            | 2.32 | cellobiose dehydrogenase                                                       |
| FGRRES_16076_M | FGSG_12203,FGSG_12204 | FGSG_12203,FGSG_12204 | 2.32 | tartrate transporter                                                           |

|                |                       |                       |      |                                                                         |
|----------------|-----------------------|-----------------------|------|-------------------------------------------------------------------------|
| FGRRES_07852   | FGSG_07852            | FGSG_07852            | 2.33 | alcohol dehydrogenase bli-4                                             |
| FGRRES_07390   | FGSG_07390            | FGSG_07390            | 2.33 | uncharacterized protein ffuj_02532                                      |
| FGRRES_15687   | FGSG_00110            | FGSG_00110            | 2.34 | ankyrin repeat protein                                                  |
| FGRRES_08597   | FGSG_08597            | FGSG_08597            | 2.35 | atp-dependent rna helicase                                              |
| FGRRES_09650_M | FGSG_09650            | FGSG_09650            | 2.35 | uncharacterized protein ffuj_04525                                      |
| FGRRES_10971   | FGSG_10971            | FGSG_10971            | 2.36 | protein ybiu                                                            |
| FGRRES_09691   | FGSG_09691            | FGSG_09691            | 2.36 | c2 domain protein                                                       |
| FGRRES_03144   | FGSG_03144            | FGSG_03144            | 2.37 | hexose transporter protein                                              |
| FGRRES_09595   | FGSG_09595            | FGSG_09595            | 2.39 | aflatoxin efflux pump aflt                                              |
| FGRRES_11088   | FGSG_11088            | FGSG_11088            | 2.41 | na(+) h(+) antiporter                                                   |
| FGRRES_10562   | FGSG_10562            | FGSG_10562            | 2.41 | hypothetical protein FGSG_10562<br>[Fusarium graminearum PH-1]          |
| FGRRES_16374   | FGSG_12560,FGSG_12561 | FGSG_12560,FGSG_12561 | 2.42 | ryanodine receptor ryr                                                  |
| FGRRES_17085   | FGSG_08205            | FGSG_08205            | 2.42 | aminotransferase class-iii                                              |
| FGRRES_10150   | FGSG_10150            | FGSG_10150            | 2.43 | ph-response regulator                                                   |
| FGRRES_08292   | FGSG_08292            | FGSG_08292            | 2.43 | hypothetical protein FGSG_08292<br>[Fusarium graminearum PH-1]          |
| FGRRES_10483   | FGSG_10483            | FGSG_10483            | 2.43 | quinic acid permease                                                    |
| FGRRES_02036   | FGSG_02036            | FGSG_02036            | 2.44 | uncharacterized protein lw94_318                                        |
| FGRRES_11162   | FGSG_11162            | FGSG_11162            | 2.46 | ab hydrolase superfamily protein yisv                                   |
| FGRRES_17670_M | FGSG_05470            | FGSG_05470            | 2.46 | v-type h <sup>+</sup> -transporting atpase 16kda<br>proteolipid subunit |
| FGRRES_03619_M | FGSG_03619            | FGSG_03619            | 2.48 | unnamed protein product [Fusarium<br>graminearum]                       |
| FGRRES_02087   | FGSG_02087            | FGSG_02087            | 2.48 | uncharacterized protein lw93_5739                                       |
| FGRRES_05450   | FGSG_05450            | FGSG_05450            | 2.48 | mercuric reductase                                                      |
| FGRRES_07488   | FGSG_07488            | FGSG_07488            | 2.49 | uncharacterized protein ffuj_02429                                      |
| FGRRES_10311   | FGSG_10311            | FGSG_10311            | 2.49 | uncharacterized protein y057_12149                                      |

|                |            |            |      |                                                                         |
|----------------|------------|------------|------|-------------------------------------------------------------------------|
| FGRRES_03563   | FGSG_03563 | FGSG_03563 | 2.51 | lsb3-possible role in the regulation of actin cytoskeletal organization |
| FGRRES_11046   | FGSG_11046 | FGSG_11046 | 2.51 | uncharacterized protein lw93_6101                                       |
| FGRRES_17449   | FGSG_11224 | FGSG_11224 | 2.52 | disintegrin and metalloproteinase domain-containing protein b           |
| FGRRES_00738   | FGSG_00738 | FGSG_00738 | 2.54 | uncharacterized protein ffuj_00499                                      |
| FGRRES_11985   | FGSG_11985 | FGSG_11985 | 2.54 | galactose-proton symport                                                |
| FGRRES_04746   | FGSG_04746 | FGSG_04746 | 2.55 | uncharacterized protein lw94_11412                                      |
| FGRRES_13832   | FGSG_13832 | FGSG_13832 | 2.56 | p-loop containing nucleoside triphosphate partial                       |
| FGRRES_05458   | FGSG_05458 | FGSG_05458 | 2.56 | uncharacterized protein ffuj_08588                                      |
| FGRRES_11097   | FGSG_11097 | FGSG_11097 | 2.56 | fungistatic metabolite                                                  |
| FGRRES_16906   | FGSG_07820 | FGSG_07820 | 2.58 | uncharacterized protein lw93_12095                                      |
| FGRRES_06548   | FGSG_06548 | FGSG_06548 | 2.60 | ndp-n-acetyl-d-galactosaminuronic acid dehydrogenase                    |
| FGRRES_09522   | FGSG_09522 | FGSG_09522 | 2.61 | tyrosinase precursor                                                    |
| FGRRES_07988   | FGSG_07988 | FGSG_07988 | 2.62 | cell wall protein                                                       |
| FGRRES_11864   | FGSG_11864 | FGSG_11864 | 2.62 | mrna 3'-end-processing protein yth1                                     |
| FGRRES_08079   | FGSG_08079 | FGSG_08079 | 2.63 | benzoate 4-monooxygenase                                                |
| FGRRES_07822   | FGSG_07822 | FGSG_07822 | 2.63 | serine proteinase                                                       |
| FGRRES_00184   | FGSG_00184 | FGSG_00184 | 2.63 | xylanase 1                                                              |
| FGRRES_12379_M | FGSG_12379 | FGSG_12379 | 2.64 | amino acid transport protein gap1                                       |
| FGRRES_16907   | FGSG_07825 | FGSG_07825 | 2.65 | uncharacterized protein lw93_3378                                       |
| FGRRES_05375   | FGSG_05375 | FGSG_05375 | 2.66 | betaine-aldehyde dehydrogenase                                          |
| FGRRES_06549   | FGSG_06549 | FGSG_06549 | 2.67 | chitin binding protein                                                  |
| FGRRES_10997   | FGSG_10997 | FGSG_10997 | 2.68 | uncharacterized protein lw93_6944                                       |
| FGRRES_09267   | FGSG_09267 | FGSG_09267 | 2.68 | mitochondrial chaperone bcs1                                            |
| FGRRES_07628   | FGSG_07628 | FGSG_07628 | 2.69 | 3-hydroxybenzoate 6-hydroxylase                                         |

|                |            |            |      |  |  |  |                                                             |
|----------------|------------|------------|------|--|--|--|-------------------------------------------------------------|
| FGRRES_03319   | FGSG_03319 | FGSG_03319 | 2.71 |  |  |  | tob3 (member of aaa-atpase family)                          |
| FGRRES_07662_M | FGSG_07662 | FGSG_07662 | 2.72 |  |  |  | umta protein                                                |
| FGRRES_11081   | FGSG_11081 | FGSG_11081 | 2.73 |  |  |  | zeaxanthin chloroplastic                                    |
| FGRRES_12331   | FGSG_12331 | FGSG_12331 | 2.74 |  |  |  | zinc-binding oxidoreductase                                 |
| FGRRES_05663   | FGSG_05663 | FGSG_05663 | 2.77 |  |  |  | polysaccharide deacetylase family protein                   |
| FGRRES_10386   | FGSG_10386 | FGSG_10386 | 2.77 |  |  |  | uncharacterized protein ffuj_07062                          |
| FGRRES_13464   | FGSG_13464 | FGSG_13464 | 2.77 |  |  |  | hypothetical protein FGSG_13464 [Fusarium graminearum PH-1] |
| FGRRES_07096   | FGSG_07096 | FGSG_07096 | 2.78 |  |  |  | glycerol 3-phosphatase 1                                    |
| FGRRES_03394   | FGSG_03394 | FGSG_03394 | 2.79 |  |  |  | secreted protein                                            |

|              |            |            |      |         |       |  |                                                                                                                                                                                                           |
|--------------|------------|------------|------|---------|-------|--|-----------------------------------------------------------------------------------------------------------------------------------------------------------------------------------------------------------|
|              |            |            |      |         |       |  | Lanosterol 14-alpha-demethylase; catalyzes C-14 demethylation of lanosterol to form 4,4"-dimethyl cholesterol-8,14,24-triene-3-beta-ol in ergosterol biosynthesis pathway;                                |
| FGRRES_01000 | FGSG_01000 | FGSG_01000 | 2.80 | YHR007C | ERG11 |  | transcriptionally down-regulated when ergosterol is in excess; member of cytochrome P450 family; associated and coordinately regulated with the P450 reductase Ncp1p; human eburicol 14-alpha-demethylase |

|                |            |            |      | CYP51A1 functionally complements the lethality of the erg11 null mutation   |
|----------------|------------|------------|------|-----------------------------------------------------------------------------|
| FGRRES_17390   | FGSG_10566 | FGSG_10566 | 2.80 | insecticidal toxin complex protein                                          |
| FGRRES_09493   | FGSG_09493 | FGSG_09493 | 2.83 | uncharacterized protein ffuj_04359                                          |
| FGRRES_03659   | FGSG_03659 | FGSG_03659 | 2.83 | nitrosoguanidine resistance protein sng1                                    |
| FGRRES_08207_M | FGSG_08207 | FGSG_08207 | 2.84 | prostacyclin synthase                                                       |
| FGRRES_04215   | FGSG_04215 | FGSG_04215 | 2.84 | monocarboxylate transporter 2                                               |
| FGRRES_17324_M | FGSG_10169 | FGSG_10169 | 2.85 | bsc1 transcript encoded by this orf shows a high level of stop codon bypass |
| FGRRES_16556_M | FGSG_12827 | FGSG_12827 | 2.85 | mannitol-1-phosphate 5-dehydrogenase                                        |
| FGRRES_12651   | FGSG_12651 | FGSG_12651 | 2.87 | uncharacterized protein ffuj_03895                                          |
| FGRRES_15753   | FGSG_11787 | FGSG_11787 | 2.87 | hxb protein                                                                 |
| FGRRES_07699   | FGSG_07699 | FGSG_07699 | 2.90 | hypothetical protein FGSG_07699 [Fusarium graminearum PH-1]                 |
| FGRRES_15978   | FGSG_02391 | FGSG_02391 | 2.90 | uncharacterized protein y057_6261                                           |
| FGRRES_13505   | FGSG_13505 | FGSG_13505 | 2.91 | hypothetical protein FGSG_13505 [Fusarium graminearum PH-1]                 |
| FGRRES_03554   | FGSG_03554 | FGSG_03554 | 2.91 | cvnh domain-containing protein                                              |
| FGRRES_08164   | FGSG_08164 | FGSG_08164 | 2.91 | transmembrane transporter liz1p                                             |
| FGRRES_03565   | FGSG_03565 | FGSG_03565 | 2.92 | nitrogen starvation-induced glutamine rich protein                          |
| FGRRES_00023   | FGSG_00023 | FGSG_00023 | 2.92 | spherulin-1a                                                                |
| FGRRES_17389   | FGSG_10564 | FGSG_10564 | 2.93 | toxin subunit protein                                                       |



|              |            |            |      |         |      |                                                                                                                                                                                                                                               |
|--------------|------------|------------|------|---------|------|-----------------------------------------------------------------------------------------------------------------------------------------------------------------------------------------------------------------------------------------------|
| FGRRES_17232 | FGSG_09540 | FGSG_09540 | 2.94 |         |      | uncharacterized protein lw93_14077                                                                                                                                                                                                            |
| FGRRES_16511 | FGSG_05622 | FGSG_05622 | 2.95 |         |      | trehalase                                                                                                                                                                                                                                     |
| FGRRES_15926 | FGSG_02068 | FGSG_02068 | 2.96 |         |      | dal81-transcriptional activator                                                                                                                                                                                                               |
| FGRRES_11545 | FGSG_11545 | FGSG_11545 | 2.96 |         |      | uncharacterized protein ffuj_14028                                                                                                                                                                                                            |
| FGRRES_01149 | FGSG_01149 | FGSG_01149 | 2.96 |         |      | ring finger protein b                                                                                                                                                                                                                         |
| FGRRES_16063 | FGSG_11571 | FGSG_11571 | 3.00 | YLL055W | YCT1 | High-affinity cysteine-specific transporter; has similarity to the Dal5p family of transporters; green fluorescent protein (GFP)-fusion protein localizes to the endoplasmic reticulum; YCT1 is not an essential gene<br>cysteine transporter |
| FGRRES_02925 | FGSG_02925 | FGSG_02925 | 3.00 |         |      | uncharacterized protein ffuj_05402                                                                                                                                                                                                            |
| FGRRES_12434 | FGSG_12434 | FGSG_12434 | 3.00 |         |      | uncharacterized protein y057_15048                                                                                                                                                                                                            |
| FGRRES_16884 | FGSG_07719 | FGSG_07719 | 3.00 |         |      | uncharacterized protein ffuj_14624                                                                                                                                                                                                            |
| FGRRES_01785 | FGSG_01785 | FGSG_01785 | 3.01 |         |      | c4-dicarboxylate transport protein<br>mae1                                                                                                                                                                                                    |
| FGRRES_07861 | FGSG_07861 | FGSG_07861 | 3.01 |         |      | protein cap22                                                                                                                                                                                                                                 |
| FGRRES_15676 | FGSG_11989 | FGSG_11989 | 3.02 |         |      | aureobasidin a1 biosynthesis complex                                                                                                                                                                                                          |
| FGRRES_04430 | FGSG_04430 | FGSG_04430 | 3.02 |         |      | pectate lyase 1                                                                                                                                                                                                                               |
| FGRRES_13422 | FGSG_13422 | FGSG_13422 | 3.03 |         |      | hypothetical protein FGSG_13422<br>[Fusarium graminearum PH-1]                                                                                                                                                                                |
| FGRRES_09072 | FGSG_09072 | FGSG_09072 | 3.04 |         |      | uncharacterized protein lw93_8002                                                                                                                                                                                                             |
| FGRRES_01764 | FGSG_01764 | FGSG_01764 | 3.06 |         |      | hydrophobin                                                                                                                                                                                                                                   |
| FGRRES_10558 | FGSG_10558 | FGSG_10558 | 3.06 |         |      | tol protein                                                                                                                                                                                                                                   |

|                |            |            |      |                                                                   |
|----------------|------------|------------|------|-------------------------------------------------------------------|
| FGRRES_17361   | FGSG_10436 | FGSG_10436 | 3.06 | dha14-like major facilitator efflux transporter (mfs transporter) |
| FGRRES_16183   | FGSG_03910 | FGSG_03910 | 3.06 | carboxypeptidase y inhibitor                                      |
| FGRRES_02867   | FGSG_02867 | FGSG_02867 | 3.07 | kelch domain-containing protein                                   |
| FGRRES_13795   | FGSG_13795 | FGSG_13795 | 3.07 | integral membrane protein                                         |
| FGRRES_10498   | FGSG_10498 | FGSG_10498 | 3.07 | uncharacterized protein y057_14945                                |
| FGRRES_11566_M | FGSG_11566 | FGSG_11566 | 3.08 | zinc-binding dehydrogenase                                        |
| FGRRES_12214   | FGSG_12214 | FGSG_12214 | 3.08 | uncharacterized protein ffuj_03637                                |
| FGRRES_11986   | FGSG_11986 | FGSG_11986 | 3.08 | fructosyl amino acid                                              |
| FGRRES_11174_M | FGSG_11174 | FGSG_11174 | 3.09 | calcium-independent phospholipase a2-gamma                        |
| FGRRES_03725   | FGSG_03725 | FGSG_03725 | 3.10 | mfs-multidrug-resistance transporter                              |
| FGRRES_10565   | FGSG_10565 | FGSG_10565 | 3.10 | hypothetical protein FGSG_10565 [Fusarium graminearum PH-1]       |
| FGRRES_08201   | FGSG_08201 | FGSG_08201 | 3.10 | uncharacterized protein y057_3645                                 |
| FGRRES_10551   | FGSG_10551 | FGSG_10551 | 3.12 | killer toxin kp4 family protein                                   |
| FGRRES_06622   | FGSG_06622 | FGSG_06622 | 3.12 | cycloeucalenol cycloisomerase                                     |
| FGRRES_10675   | FGSG_10675 | FGSG_10675 | 3.14 | six-bladed beta-propeller -like protein                           |
| FGRRES_01783   | FGSG_01783 | FGSG_01783 | 3.14 | geranylgeranyl pyrophosphate synthase                             |
| FGRRES_11475   | FGSG_11475 | FGSG_11475 | 3.15 | major facilitator superfamily transporter                         |
| FGRRES_13964   | FGSG_13964 | FGSG_13964 | 3.17 | c2h2 finger domain containing protein                             |
| FGRRES_03801   | FGSG_03801 | FGSG_03801 | 3.18 | tyrosinase central domain protein                                 |
| FGRRES_03373   | FGSG_03373 | FGSG_03373 | 3.18 | alcohol oxidase                                                   |
| FGRRES_02423   | FGSG_02423 | FGSG_02423 | 3.19 | duf1275 domain protein                                            |
| FGRRES_02018   | FGSG_02018 | FGSG_02018 | 3.20 | duf500 domain protein                                             |
| FGRRES_09142   | FGSG_09142 | FGSG_09142 | 3.21 | kelch domain-containing protein 8a                                |

|                  |                       |                       |      |         |      |                                                                                                                                                                                                                                                                                                                                                               |
|------------------|-----------------------|-----------------------|------|---------|------|---------------------------------------------------------------------------------------------------------------------------------------------------------------------------------------------------------------------------------------------------------------------------------------------------------------------------------------------------------------|
| FGRRES_12096_7_M | FGSG_12096,FGSG_12097 | FGSG_12096,FGSG_12097 | 3.21 |         |      | uncharacterized protein lw94_14682                                                                                                                                                                                                                                                                                                                            |
| FGRRES_02342_M   | FGSG_02342            | FGSG_02342            | 3.21 |         |      | carbohydrate esterase family 5 protein                                                                                                                                                                                                                                                                                                                        |
| FGRRES_11987     | FGSG_11987            | FGSG_11987            | 3.22 |         |      | fad dependent oxidoreductase                                                                                                                                                                                                                                                                                                                                  |
| FGRRES_03925     | FGSG_03925            | FGSG_03925            | 3.22 |         |      | uncharacterized protein lw94_14686                                                                                                                                                                                                                                                                                                                            |
| FGRRES_02145     | FGSG_02145            | FGSG_02145            | 3.22 | YGR055W | MUP1 | High affinity methionine permease; integral membrane protein with 13 putative membrane-spanning regions; involved in both methionine and cysteine uptake; subject to transport-activity dependent, methionine-induced endocytosis, vacuolar delivery and degradation; starvation-induced endocytosis is transport-activity independent<br>amino acid permease |
| FGRRES_03432     | FGSG_03432            | FGSG_03432            | 3.22 |         |      | endothiapepsin precursor                                                                                                                                                                                                                                                                                                                                      |
| FGRRES_03674_M   | FGSG_03674            | FGSG_03674            | 3.23 |         |      | filamentous hemagglutinin adhesin                                                                                                                                                                                                                                                                                                                             |
| FGRRES_09103     | FGSG_09103            | FGSG_09103            | 3.23 |         |      | 2og-fe oxygenase superfamily protein                                                                                                                                                                                                                                                                                                                          |
| FGRRES_04429     | FGSG_04429            | FGSG_04429            | 3.23 |         |      | uncharacterized protein lw93_9003                                                                                                                                                                                                                                                                                                                             |
| FGRRES_12335     | FGSG_12335            | FGSG_12335            | 3.24 |         |      | dha14-like major facilitator efflux transporter (mfs transporter)                                                                                                                                                                                                                                                                                             |
| FGRRES_17148_M   | FGSG_09029            | FGSG_09029            | 3.25 |         |      | uncharacterized protein lw93_5233                                                                                                                                                                                                                                                                                                                             |

|                |                       |                       |      |                                                             |
|----------------|-----------------------|-----------------------|------|-------------------------------------------------------------|
| FGRRES_10636   | FGSG_10636            | FGSG_10636            | 3.26 | translationally-controlled tumor protein                    |
| FGRRES_03873_M | FGSG_03783            | FGSG_03783            | 3.26 | uncharacterized protein lw93_7023                           |
| FGRRES_07810   | FGSG_07810            | FGSG_07810            | 3.27 | n amino acid transport system protein                       |
| FGRRES_04667   | FGSG_04667            | FGSG_04667            | 3.27 | alpha-ketoglutarate-dependent sulfonate dioxygenase         |
| FGRRES_03714   | FGSG_03714            | FGSG_03714            | 3.28 | dfg5 protein                                                |
| FGRRES_09289   | FGSG_09289            | FGSG_09289            | 3.30 | ice nucleation protein                                      |
| FGRRES_16872   | FGSG_07664            | FGSG_07664            | 3.35 | unnamed protein product [Fusarium graminearum]              |
| FGRRES_16093   | FGSG_04566            | FGSG_04566            | 3.36 | uncharacterized protein y057_13136                          |
| FGRRES_17149   | FGSG_09033            | FGSG_09033            | 3.36 | uncharacterized protein y057_3621                           |
| FGRRES_11568   | FGSG_11568            | FGSG_11568            | 3.37 | 4-hydroxyacetophenone monooxygenase                         |
| FGRRES_02668   | FGSG_02668            | FGSG_02668            | 3.38 | psi-producing oxygenase c                                   |
| FGRRES_10326   | FGSG_10326            | FGSG_10326            | 3.38 | uncharacterized protein ffuj_07122                          |
| FGRRES_13423   | FGSG_13423            | FGSG_13423            | 3.40 | hypothetical protein FGSG_13423 [Fusarium graminearum PH-1] |
| FGRRES_01342   | FGSG_01342            | FGSG_01342            | 3.40 | alternative mitochondrial                                   |
| FGRRES_09477   | FGSG_09477            | FGSG_09477            | 3.41 | related to fad-binding                                      |
| FGRRES_08021_M | FGSG_08021            | FGSG_08021            | 3.42 | cell surface protein                                        |
| FGRRES_13952   | FGSG_13952            | FGSG_13952            | 3.43 | uncharacterized protein ffuj_08920                          |
| FGRRES_03120   | FGSG_03120            | FGSG_03120            | 3.43 | diacylglycerol pyrophosphate phosphatase dpp1               |
| FGRRES_05846   | FGSG_05846            | FGSG_05846            | 3.46 | uncharacterized protein lw94_5257                           |
| FGRRES_11080   | FGSG_11080            | FGSG_11080            | 3.47 | integral membrane protein                                   |
| FGRRES_12497   | FGSG_12497            | FGSG_12497            | 3.50 | heterokaryon incompatibility                                |
| FGRRES_17057   | FGSG_13393,FGSG_13394 | FGSG_13393,FGSG_13394 | 3.52 | long-chain-fatty-acid- ligase                               |

|                |            |            |      |         |      |                                                                                                                                                                                                    |
|----------------|------------|------------|------|---------|------|----------------------------------------------------------------------------------------------------------------------------------------------------------------------------------------------------|
| FGRRES_16175   | FGSG_03973 | FGSG_03973 | 3.53 |         |      | serum paraoxonase arylesterase                                                                                                                                                                     |
| FGRRES_07567   | FGSG_07567 | FGSG_07567 | 3.54 |         |      | multidrug resistance protein                                                                                                                                                                       |
| FGRRES_02154_M | FGSG_02154 | FGSG_02154 | 3.54 |         |      | unnamed protein product [Fusarium graminearum]                                                                                                                                                     |
| FGRRES_01513   | FGSG_01513 | FGSG_01513 | 3.54 |         |      | uncharacterized protein lw93_11502                                                                                                                                                                 |
| FGRRES_16581   | FGSG_05967 | FGSG_05967 | 3.56 |         |      | uncharacterized protein ffuj_13160                                                                                                                                                                 |
| FGRRES_11155   | FGSG_11155 | FGSG_11155 | 3.57 |         |      | hypothetical protein FGSG_11155 [Fusarium graminearum PH-1]                                                                                                                                        |
| FGRRES_07027   | FGSG_07027 | FGSG_07027 | 3.57 |         |      | uncharacterized protein ffuj_02827                                                                                                                                                                 |
| FGRRES_03245_M | FGSG_03245 | FGSG_03245 | 3.58 |         |      | non-ribosomal peptide synthetase                                                                                                                                                                   |
| FGRRES_02748   | FGSG_02748 | FGSG_02748 | 3.58 |         |      | endothelin-converting enzyme 1                                                                                                                                                                     |
| FGRRES_00209   | FGSG_00209 | FGSG_00209 | 3.58 |         |      | uncharacterized protein ffuj_10847                                                                                                                                                                 |
| FGRRES_03588   | FGSG_03588 | FGSG_03588 | 3.61 |         |      | integral membrane protein pth11                                                                                                                                                                    |
| FGRRES_12424   | FGSG_12424 | FGSG_12424 | 3.61 |         |      | uncharacterized protein ffuj_10439                                                                                                                                                                 |
| FGRRES_12445   | FGSG_12445 | FGSG_12445 | 3.64 |         |      | inactive purple acid phosphatase 16                                                                                                                                                                |
| FGRRES_03586   | FGSG_03586 | FGSG_03586 | 3.64 |         |      | uncharacterized protein y057_6275                                                                                                                                                                  |
| FGRRES_03489   | FGSG_03489 | FGSG_03489 | 3.64 |         |      | uncharacterized protein lw93_10986                                                                                                                                                                 |
| FGRRES_07532_M | FGSG_07532 | FGSG_07532 | 3.65 |         |      | integral membrane protein                                                                                                                                                                          |
| FGRRES_10081   | FGSG_10081 | FGSG_10081 | 3.66 |         |      | hard surface induced protein 3                                                                                                                                                                     |
| FGRRES_03233   | FGSG_03233 | FGSG_03233 | 3.67 |         |      | sugar transporter                                                                                                                                                                                  |
| FGRRES_07389   | FGSG_07389 | FGSG_07389 | 3.70 | YNR074C | AIF1 | Mitochondrial cell death effector; translocates to the nucleus in response to apoptotic stimuli; triggers apoptosis in cells lacking HXK2; homolog of mammalian uncharacterized protein ffuj_02531 |

|              |            |            |      | Apoptosis-Inducing<br>Factor, putative reduc-<br>tase          |
|--------------|------------|------------|------|----------------------------------------------------------------|
| FGRRES_12123 | FGSG_12123 | FGSG_12123 | 3.70 | siderophore biosynthesis                                       |
| FGRRES_13432 | FGSG_13432 | FGSG_13432 | 3.71 | uncharacterized protein ffuj_11541                             |
| FGRRES_12251 | FGSG_12251 | FGSG_12251 | 3.72 | arylsulfatase                                                  |
| FGRRES_07569 | FGSG_07569 | FGSG_07569 | 3.74 | rf2 protein                                                    |
| FGRRES_05838 | FGSG_05838 | FGSG_05838 | 3.74 | uncharacterized protein y057_13444                             |
| FGRRES_03587 | FGSG_03587 | FGSG_03587 | 3.75 | uncharacterized protein y057_6261                              |
| FGRRES_01661 | FGSG_01661 | FGSG_01661 | 3.77 | taurine dioxygenase                                            |
| FGRRES_16869 | FGSG_07647 | FGSG_07647 | 3.80 | uncharacterized protein lw93_6396                              |
| FGRRES_02933 | FGSG_02933 | FGSG_02933 | 3.81 | uncharacterized protein y057_10495                             |
| FGRRES_03620 | FGSG_03620 | FGSG_03620 | 3.82 | hypothetical protein FGSG_03620<br>[Fusarium graminearum PH-1] |
| FGRRES_02269 | FGSG_02269 | FGSG_02269 | 3.83 | uncharacterized protein ffuj_03548                             |
| FGRRES_03828 | FGSG_03828 | FGSG_03828 | 3.84 | mannose-binding lectin                                         |
| FGRRES_00725 | FGSG_00725 | FGSG_00725 | 3.84 | c6 transcription factor                                        |
| FGRRES_06517 | FGSG_06517 | FGSG_06517 | 3.84 | dihydroxy-acid dehydratase                                     |
| FGRRES_06149 | FGSG_06149 | FGSG_06149 | 3.87 | diatom spindle kinesin 1                                       |
| FGRRES_03748 | FGSG_03748 | FGSG_03748 | 3.89 | uncharacterized protein ffuj_10848                             |
| FGRRES_04600 | FGSG_04600 | FGSG_04600 | 3.89 | hypothetical protein FGSG_04600<br>[Fusarium graminearum PH-1] |
| FGRRES_11341 | FGSG_11341 | FGSG_11341 | 3.95 | udp-glycosyltransferase 84b2                                   |
| FGRRES_12815 | FGSG_12815 | FGSG_12815 | 3.97 | hypothetical protein FGSG_12815<br>[Fusarium graminearum PH-1] |
| FGRRES_16332 | FGSG_03091 | FGSG_03091 | 3.97 | uncharacterized protein ffuj_11840                             |
| FGRRES_11630 | FGSG_11630 | FGSG_11630 | 3.97 | uncharacterized protein ffuj_05664                             |
| FGRRES_03812 | FGSG_03812 | FGSG_03812 | 4.01 | epoxide hydrolase                                              |

|                |            |            |      |                                                                |
|----------------|------------|------------|------|----------------------------------------------------------------|
| FGRRES_02137   | FGSG_02137 | FGSG_02137 | 4.01 | cytochrome-b5 reductase                                        |
| FGRRES_11436   | FGSG_11436 | FGSG_11436 | 4.02 | uncharacterized protein lw93_14918                             |
| FGRRES_03695   | FGSG_03695 | FGSG_03695 | 4.02 | endoglucanase iv precursor                                     |
| FGRRES_11146   | FGSG_11146 | FGSG_11146 | 4.02 | heme peroxidase                                                |
| FGRRES_03001   | FGSG_03001 | FGSG_03001 | 4.02 | uncharacterized protein ffuj_11899                             |
| FGRRES_11461   | FGSG_11461 | FGSG_11461 | 4.03 | uncharacterized protein lw93_3994                              |
| FGRRES_02667   | FGSG_02667 | FGSG_02667 | 4.05 | uncharacterized protein y057_4108                              |
| FGRRES_07895   | FGSG_07895 | FGSG_07895 | 4.05 | uncharacterized protein ffuj_14529                             |
| FGRRES_02217   | FGSG_02217 | FGSG_02217 | 4.08 | catalase                                                       |
| FGRRES_12956   | FGSG_12956 | FGSG_12956 | 4.14 | uncharacterized protein lw93_1732                              |
| FGRRES_03361_M | FGSG_03361 | FGSG_03361 | 4.16 | transcriptional regulatory protein                             |
| FGRRES_03046   | FGSG_03046 | FGSG_03046 | 4.17 | uncharacterized protein y057_2145                              |
| FGRRES_01778   | FGSG_01778 | FGSG_01778 | 4.18 | hypothetical protein FGSG_01778<br>[Fusarium graminearum PH-1] |
| FGRRES_05719   | FGSG_05719 | FGSG_05719 | 4.18 | uncharacterized protein lw93_11922                             |
| FGRRES_09086_M | FGSG_09086 | FGSG_09086 | 4.19 | unnamed protein product [Fusarium<br>graminearum]              |
| FGRRES_17059   | FGSG_08302 | FGSG_08302 | 4.23 | rna polymerase rpb1 c-terminal repeat<br>domain protein        |
| FGRRES_09311   | FGSG_09311 | FGSG_09311 | 4.23 | phenylalanine ammonia-lyase                                    |
| FGRRES_03042   | FGSG_03042 | FGSG_03042 | 4.24 | 2'-hydroxyisoflavone reductase                                 |
| FGRRES_16074   | FGSG_04684 | FGSG_04684 | 4.28 | uncharacterized protein lw93_6843                              |
| FGRRES_01126   | FGSG_01126 | FGSG_01126 | 4.29 | peptidoglycan binding domain-con-<br>taining protein           |
| FGRRES_11204   | FGSG_11204 | FGSG_11204 | 4.30 | secreted protein                                               |
| FGRRES_02398   | FGSG_02398 | FGSG_02398 | 4.31 | basic-leucine zipper transcription fac-<br>tor                 |

|                |            |            |      |                                                             |
|----------------|------------|------------|------|-------------------------------------------------------------|
| FGRRES_02125   | FGSG_02125 | FGSG_02125 | 4.32 | tgf beta induced protein ig-h3 precursor                    |
| FGRRES_17340   | FGSG_13739 | FGSG_13739 | 4.32 | benzoate 4-monooxygenase cytochrome                         |
| FGRRES_03680   | FGSG_03680 | FGSG_03680 | 4.32 | aquaporin rerated other eukaryote                           |
| FGRRES_03101   | FGSG_03101 | FGSG_03101 | 4.34 | uncharacterized protein ffuj_11665                          |
| FGRRES_09521   | FGSG_09521 | FGSG_09521 | 4.38 | dihydrodipicolinate synthetase                              |
| FGRRES_07318   | FGSG_07318 | FGSG_07318 | 4.39 | adh5-alcohol dehydrogenase v                                |
| FGRRES_03832   | FGSG_03832 | FGSG_03832 | 4.39 | related to ankyrin                                          |
| FGRRES_03040   | FGSG_03040 | FGSG_03040 | 4.39 | uncharacterized protein lw93_3388                           |
| FGRRES_04442   | FGSG_04442 | FGSG_04442 | 4.39 | uncharacterized protein ffuj_14701                          |
| FGRRES_05799   | FGSG_05799 | FGSG_05799 | 4.40 | uncharacterized protein lw93_8185                           |
| FGRRES_08076   | FGSG_08076 | FGSG_08076 | 4.41 | uncharacterized protein cpur_03265                          |
| FGRRES_16280   | FGSG_03388 | FGSG_03388 | 4.42 | uncharacterized protein lw93_7820                           |
| FGRRES_16506_M | FGSG_05588 | FGSG_05588 | 4.43 | uncharacterized protein ffuj_08721                          |
| FGRRES_11192   | FGSG_11192 | FGSG_11192 | 4.49 | l-amino acid oxidase                                        |
| FGRRES_17122   | FGSG_13461 | FGSG_13461 | 4.50 | related to integral membrane protein pth11                  |
| FGRRES_16061   | FGSG_11567 | FGSG_11567 | 4.60 | major facilitator superfamily transporter                   |
| FGRRES_11132   | FGSG_11132 | FGSG_11132 | 4.63 | cyanamide hydratase                                         |
| FGRRES_01695_M | FGSG_01695 | FGSG_01695 | 4.64 | uncharacterized protein ffuj_01909                          |
| FGRRES_17404   | FGSG_10621 | FGSG_10621 | 4.67 | xyloglucan endo-transglycosylase-like protein               |
| FGRRES_03521   | FGSG_03521 | FGSG_03521 | 4.67 | cupin superfamily protein                                   |
| FGRRES_12673   | FGSG_12673 | FGSG_12673 | 4.68 | hypothetical protein FGSG_12673 [Fusarium graminearum PH-1] |
| FGRRES_12738   | FGSG_12738 | FGSG_12738 | 4.68 | uncharacterized protein ffuj_14917                          |



|                |                       |                       |      |         |      |                                                                                                                                                                                  |
|----------------|-----------------------|-----------------------|------|---------|------|----------------------------------------------------------------------------------------------------------------------------------------------------------------------------------|
| FGRRES_05076   | FGSG_05076            | FGSG_05076            | 4.69 |         |      | abc transporter protein (atp-binding-cassette protein)                                                                                                                           |
| FGRRES_02486   | FGSG_02486            | FGSG_02486            | 4.70 |         |      | gmp synthase                                                                                                                                                                     |
| FGRRES_16115_M | FGSG_04440            | FGSG_04440            | 4.72 |         |      | multidrug transporter                                                                                                                                                            |
| FGRRES_05606   | FGSG_05606            | FGSG_05606            | 4.74 |         |      | uncharacterized protein ffuj_08741                                                                                                                                               |
| FGRRES_03030_M | FGSG_03030            | FGSG_03030            | 4.78 |         |      | unnamed protein product [Fusarium graminearum]                                                                                                                                   |
| FGRRES_07578   | FGSG_07578            | FGSG_07578            | 4.79 |         |      | 3-dehydroquinate synthase                                                                                                                                                        |
| FGRRES_17553   | FGSG_11422            | FGSG_11422            | 4.84 |         |      | phosphatidylserine decarboxylase 2                                                                                                                                               |
| FGRRES_09133   | FGSG_09133            | FGSG_09133            | 4.85 |         |      | uncharacterized protein ffuj_10134                                                                                                                                               |
| FGRRES_12523   | FGSG_12523            | FGSG_12523            | 4.86 |         |      | transmembrane protein 53-b                                                                                                                                                       |
| FGRRES_16049   | FGSG_11529            | FGSG_11529            | 4.88 |         |      | integral membrane protein                                                                                                                                                        |
| FGRRES_03274   | FGSG_03274            | FGSG_03274            | 4.88 |         |      | uncharacterized protein lw93_15001                                                                                                                                               |
| FGRRES_04797   | FGSG_04797            | FGSG_04797            | 4.91 |         |      | uncharacterized protein ffuj_11303                                                                                                                                               |
| FGRRES_07741_M | FGSG_07741            | FGSG_07741            | 4.94 |         |      | volvatoxin a2 precursor                                                                                                                                                          |
| FGRRES_07388   | FGSG_07388            | FGSG_07388            | 4.97 |         |      | enoyl- hydratase isomerase                                                                                                                                                       |
| FGRRES_16103   | FGSG_12237,FGSG_12239 | FGSG_12237,FGSG_12239 | 4.97 |         |      | ankyrin repeat protein                                                                                                                                                           |
| FGRRES_11166   | FGSG_11166            | FGSG_11166            | 4.97 |         |      | hypothetical protein FGSG_11166 [Fusarium graminearum PH-1]                                                                                                                      |
| FGRRES_09336   | FGSG_09336            | FGSG_09336            | 4.98 |         |      | uncharacterized protein ffuj_12690                                                                                                                                               |
| FGRRES_03819   | FGSG_03819            | FGSG_03819            | 4.98 | YOR246C | ENV9 | Conserved oxidoreductase involved in lipid droplet morphology; mutant shows defects in CPY processing and vacuolar morphology; required for replication of related to reductases |

|                |                       |                       |      |         |      |                                                                                                                                                                                                                                 |
|----------------|-----------------------|-----------------------|------|---------|------|---------------------------------------------------------------------------------------------------------------------------------------------------------------------------------------------------------------------------------|
|                |                       |                       |      |         |      | Brome mosaic virus in<br>S. cerevisiae, a model<br>system for studying<br>replication of positive-<br>strand RNA viruses in<br>their natural hosts;<br>homologus to human<br>RDH12 linked to<br>Leber Congenital Am-<br>aurosis |
| FGRRES_10612   | FGSG_10612            | FGSG_10612            | 4.99 |         |      | salicylate hydroxylase                                                                                                                                                                                                          |
| FGRRES_03275   | FGSG_03275            | FGSG_03275            | 4.99 |         |      | uncharacterized protein ffuj_14309                                                                                                                                                                                              |
| FGRRES_00003   | FGSG_00003            | FGSG_00003            | 5.01 |         |      | uncharacterized protein lw93_11030                                                                                                                                                                                              |
| FGRRES_16845   | FGSG_07556            | FGSG_07556            | 5.01 |         |      | sulphydryl oxidase                                                                                                                                                                                                              |
| FGRRES_16226   | FGSG_12399,FGSG_12400 | FGSG_12399,FGSG_12400 | 5.03 |         |      | cercosporin resistance protein                                                                                                                                                                                                  |
| FGRRES_16205   | FGSG_03782            | FGSG_03782            | 5.06 |         |      | 6-hydroxy-d-nicotine oxidase                                                                                                                                                                                                    |
| FGRRES_09054   | FGSG_09054            | FGSG_09054            | 5.07 |         |      | flavin-binding monooxygenase-like<br>family protein                                                                                                                                                                             |
| FGRRES_03463   | FGSG_03463            | FGSG_03463            | 5.07 |         |      | uncharacterized protein y057_2935                                                                                                                                                                                               |
| FGRRES_02861   | FGSG_02861            | FGSG_02861            | 5.08 |         |      | uncharacterized protein ffuj_05524                                                                                                                                                                                              |
| FGRRES_10052   | FGSG_10052            | FGSG_10052            | 5.09 |         |      | integral membrane protein                                                                                                                                                                                                       |
| FGRRES_04745   | FGSG_04745            | FGSG_04745            | 5.10 |         |      | antifungal protein                                                                                                                                                                                                              |
| FGRRES_10623   | FGSG_10623            | FGSG_10623            | 5.15 |         |      | uncharacterized protein ffuj_12690                                                                                                                                                                                              |
| FGRRES_04029   | FGSG_04029            | FGSG_04029            | 5.16 |         |      | uncharacterized protein ffuj_09454                                                                                                                                                                                              |
| FGRRES_03167_M | FGSG_03167            | FGSG_03167            | 5.17 |         |      | uncharacterized protein ffuj_11017                                                                                                                                                                                              |
| FGRRES_06656   | FGSG_06656            | FGSG_06656            | 5.19 | YOR049C | RSB1 | Sphingoid long-chain<br>base (LCB) efflux<br>transporter; integral<br>sphingoid long-chain base transporter<br>rsb1                                                                                                             |

|                |                       |                       |      |                                                                                                                                                                                                                                                                                                                                             |
|----------------|-----------------------|-----------------------|------|---------------------------------------------------------------------------------------------------------------------------------------------------------------------------------------------------------------------------------------------------------------------------------------------------------------------------------------------|
|                |                       |                       |      | membrane transporter<br>that localizes to the<br>plasma membrane and<br>may transport long<br>chain bases (LCBs)<br>from the cytoplasmic<br>side toward the extra-<br>cytoplasmic side of the<br>membrane; role in<br>glycerophospholipid<br>translocation; suppres-<br>sor of the sphingoid<br>LCB sensitivity of an<br>LCB-lyase mutation |
| FGRRES_09104_M | FGSG_09104            | FGSG_09104            | 5.23 | pantothenate transporter liz1                                                                                                                                                                                                                                                                                                               |
| FGRRES_03613   | FGSG_03613            | FGSG_03613            | 5.24 | uncharacterized protein ffuj_10585                                                                                                                                                                                                                                                                                                          |
| FGRRES_00734   | FGSG_00734            | FGSG_00734            | 5.27 | uncharacterized protein lw93_8075                                                                                                                                                                                                                                                                                                           |
| FGRRES_07582   | FGSG_07582            | FGSG_07582            | 5.28 | mfs sp sugar:h <sup>+</sup> symporter                                                                                                                                                                                                                                                                                                       |
| FGRRES_07982_M | FGSG_07982            | FGSG_07982            | 5.29 | unnamed protein product [Fusarium<br>graminearum]                                                                                                                                                                                                                                                                                           |
| FGRRES_16013   | FGSG_02550,FGSG_02551 | FGSG_02550,FGSG_02551 | 5.31 | manganese peroxidase 2                                                                                                                                                                                                                                                                                                                      |
| FGRRES_02138   | FGSG_02138            | FGSG_02138            | 5.35 | cytochrome p450 oxidoreductase                                                                                                                                                                                                                                                                                                              |
| FGRRES_13979   | FGSG_13979            | FGSG_13979            | 5.35 | gnat family acetyltransferase                                                                                                                                                                                                                                                                                                               |
| FGRRES_06783   | FGSG_06783            | FGSG_06783            | 5.36 | uncharacterized protein ffuj_14896                                                                                                                                                                                                                                                                                                          |
| FGRRES_17531   | FGSG_13938            | FGSG_13938            | 5.38 | probable modin                                                                                                                                                                                                                                                                                                                              |
| FGRRES_15948   | FGSG_02196            | FGSG_02196            | 5.38 | uncharacterized protein ffuj_02288                                                                                                                                                                                                                                                                                                          |
| FGRRES_03788   | FGSG_03788            | FGSG_03788            | 5.39 | glycoside hydrolase family 16 protein                                                                                                                                                                                                                                                                                                       |
| FGRRES_17587   | FGSG_11242            | FGSG_11242            | 5.52 | aerobactin siderophore                                                                                                                                                                                                                                                                                                                      |

|                |                       |                       |      |                                                                            |
|----------------|-----------------------|-----------------------|------|----------------------------------------------------------------------------|
| FGRRES_16426   | FGSG_12626,FGSG_12627 | FGSG_12626,FGSG_12627 | 5.55 | ankyrin repeat domain-containing protein 17                                |
| FGRRES_01784   | FGSG_01784            | FGSG_01784            | 5.59 | cral trio domain protein                                                   |
| FGRRES_03182   | FGSG_03182            | FGSG_03182            | 5.66 | tubulin-tyrosine ligase                                                    |
| FGRRES_00876   | FGSG_00876            | FGSG_00876            | 5.67 | protein tos1                                                               |
| FGRRES_15875   | FGSG_11990            | FGSG_11990            | 5.68 | uncharacterized protein ffuj_01907                                         |
| FGRRES_04796   | FGSG_04796            | FGSG_04796            | 5.73 | hypothetical protein FGSG_04796<br>[Fusarium graminearum PH-1]             |
| FGRRES_10583   | FGSG_10583            | FGSG_10583            | 5.73 | uncharacterized protein lw93_13170                                         |
| FGRRES_16114   | FGSG_04440            | FGSG_04440            | 5.75 | multidrug transporter                                                      |
| FGRRES_11499   | FGSG_11499            | FGSG_11499            | 5.78 | alpha- -mannosyl-glycoprotein 4-beta-<br>n-acetylglucosaminyltransferase c |
| FGRRES_11316   | FGSG_11316            | FGSG_11316            | 5.84 | alcohol dehydrogenase -like domain-<br>containing protein                  |
| FGRRES_07207   | FGSG_07207            | FGSG_07207            | 5.90 | glycosyl hydrolase family 43 protein                                       |
| FGRRES_00072   | FGSG_00072            | FGSG_00072            | 5.92 | uncharacterized protein ffuj_03953                                         |
| FGRRES_10560   | FGSG_10560            | FGSG_10560            | 5.94 | hypothetical protein FGSG_10560<br>[Fusarium graminearum PH-1]             |
| FGRRES_10998   | FGSG_10998            | FGSG_10998            | 5.97 | 6-hydroxy-d-nicotine oxidase                                               |
| FGRRES_00161   | FGSG_00161            | FGSG_00161            | 6.02 | high-affinity methionine permease                                          |
| FGRRES_00014_M | FGSG_00014            | FGSG_00014            | 6.03 | polysaccharide synthase                                                    |
| FGRRES_08244   | FGSG_08244            | FGSG_08244            | 6.08 | uncharacterized protein y057_13678                                         |
| FGRRES_15917_M | FGSG_12047            | FGSG_12047            | 6.13 | endo- -beta-xylanase                                                       |
| FGRRES_11396   | FGSG_11396            | FGSG_11396            | 6.13 | asparagine synthase                                                        |
| FGRRES_04810   | FGSG_04810            | FGSG_04810            | 6.13 | hypothetical protein FGSG_04810<br>[Fusarium graminearum PH-1]             |
| FGRRES_04749   | FGSG_04749            | FGSG_04749            | 6.16 | integral membrane protein pth11                                            |
| FGRRES_00260   | FGSG_00260            | FGSG_00260            | 6.16 | uncharacterized protein ffuj_00360                                         |

|                |            |            |      |         |       |                                                |                                                                |
|----------------|------------|------------|------|---------|-------|------------------------------------------------|----------------------------------------------------------------|
| FGRRES_03907   | FGSG_03907 | FGSG_03907 | 6.23 |         |       |                                                | uncharacterized protein y057_12670                             |
| FGRRES_04188   | FGSG_04188 | FGSG_04188 | 6.30 |         |       |                                                | hc-toxin efflux carrier toxa                                   |
| FGRRES_16358   | FGSG_02981 | FGSG_02981 | 6.33 |         |       |                                                | hypothetical protein FG05_02981<br>[Fusarium graminearum]      |
| FGRRES_04717   | FGSG_04717 | FGSG_04717 | 6.34 |         |       |                                                | ent-kaurene oxidase                                            |
| FGRRES_15872   | FGSG_01680 | FGSG_01680 | 6.35 |         |       |                                                | nonribosomal peptide                                           |
| FGRRES_01862   | FGSG_01862 | FGSG_01862 | 6.41 |         |       |                                                | uncharacterized protein ffuj_12176                             |
| FGRRES_06541   | FGSG_06541 | FGSG_06541 | 6.48 |         |       |                                                | integral membrane protein                                      |
| FGRRES_15983   | FGSG_02399 | FGSG_02399 | 6.55 |         |       |                                                | aur protein kinase                                             |
| FGRRES_14010   | FGSG_14010 | FGSG_14010 | 6.68 |         |       |                                                | hypothetical protein FGSG_14010<br>[Fusarium graminearum PH-1] |
| FGRRES_10464   | FGSG_10464 | FGSG_10464 | 6.86 |         |       |                                                | polyketide synthase                                            |
| FGRRES_10540   | FGSG_10540 | FGSG_10540 | 6.95 |         |       |                                                | hypothetical protein FGSG_10540<br>[Fusarium graminearum PH-1] |
| FGRRES_17532   | FGSG_13939 | FGSG_13939 | 6.97 |         |       |                                                | unnamed protein product [Fusarium<br>graminearum]              |
| FGRRES_07774   | FGSG_07774 | FGSG_07774 | 6.99 |         |       |                                                | uncharacterized protein ffuj_10880                             |
| FGRRES_08114_M | FGSG_08114 | FGSG_08114 | 7.04 |         |       |                                                | 5-methylthioadenosine s-adenosylho-<br>mocysteine deaminase    |
| FGRRES_05796   | FGSG_05796 | FGSG_05796 | 7.09 |         |       |                                                | ankyrin repeat protein                                         |
| FGRRES_04795   | FGSG_04795 | FGSG_04795 | 7.11 |         |       |                                                | hypothetical protein FGSG_04795<br>[Fusarium graminearum PH-1] |
| FGRRES_16173   | FGSG_12336 | FGSG_12336 | 7.21 |         |       |                                                | phosphoenolpyruvate phosphomutase                              |
| FGRRES_11647   | FGSG_11647 | FGSG_11647 | 7.30 |         |       |                                                | hypothetical protein FGSG_11647<br>[Fusarium graminearum PH-1] |
| FGRRES_17545   | FGSG_11450 | FGSG_11450 | 7.35 |         |       |                                                | tyrosinase                                                     |
| FGRRES_07557   | FGSG_07557 | FGSG_07557 | 7.44 | YML051W | GAL80 | Transcriptional regula-<br>tor involved in the | transcription co-repressor gal80                               |

|                |            |            |      |  |                                                                                                                                                                                           |
|----------------|------------|------------|------|--|-------------------------------------------------------------------------------------------------------------------------------------------------------------------------------------------|
|                |            |            |      |  | repression of GAL genes; involved in the repression of GAL genes in the absence of galactose; inhibits transcriptional activation by Gal4p; inhibition relieved by Gal3p or Gal1p binding |
| FGRRES_11546   | FGSG_11546 | FGSG_11546 | 7.53 |  | uncharacterized protein y057_1052                                                                                                                                                         |
| FGRRES_03768   | FGSG_03768 | FGSG_03768 | 7.56 |  | uncharacterized protein ffuj_11446                                                                                                                                                        |
| FGRRES_07755   | FGSG_07755 | FGSG_07755 | 7.57 |  | pathogenicity protein                                                                                                                                                                     |
| FGRRES_02216   | FGSG_02216 | FGSG_02216 | 7.58 |  | lipoxygenase 1                                                                                                                                                                            |
| FGRRES_04850   | FGSG_04850 | FGSG_04850 | 7.62 |  | hypothetical protein FGSG_04850<br>[Fusarium graminearum PH-1]                                                                                                                            |
| FGRRES_16864   | FGSG_07627 | FGSG_07627 | 7.65 |  | 6-hydroxy-d-nicotine oxidase                                                                                                                                                              |
| FGRRES_10559   | FGSG_10559 | FGSG_10559 | 7.74 |  | hypothetical protein FGSG_10559<br>[Fusarium graminearum PH-1]                                                                                                                            |
| FGRRES_17550   | FGSG_11427 | FGSG_11427 | 8.06 |  | laccase 2                                                                                                                                                                                 |
| FGRRES_00060   | FGSG_00060 | FGSG_00060 | 8.13 |  | killer kp4 smk- core                                                                                                                                                                      |
| FGRRES_10618   | FGSG_10618 | FGSG_10618 | 8.13 |  | hypothetical protein FGSG_10618<br>[Fusarium graminearum PH-1]                                                                                                                            |
| FGRRES_02935   | FGSG_02935 | FGSG_02935 | 8.42 |  | hypothetical protein FGSG_02935<br>[Fusarium graminearum PH-1]                                                                                                                            |
| FGRRES_15678_M | FGSG_00020 | FGSG_00020 | 8.48 |  | unnamed protein product [Fusarium graminearum]                                                                                                                                            |
| FGRRES_16423   | FGSG_04825 | FGSG_04825 | 8.53 |  | integral membrane protein                                                                                                                                                                 |
| FGRRES_03981_M | FGSG_03981 | FGSG_03981 | 8.61 |  | aspartate aminotransferase                                                                                                                                                                |

|                      |                       |                       |       |                                                                |
|----------------------|-----------------------|-----------------------|-------|----------------------------------------------------------------|
| FGRRES_13865         | FGSG_13865            | FGSG_13865            | 8.66  | aldehyde dehydrogenase                                         |
| FGRRES_10474         | FGSG_10474            | FGSG_10474            | 8.71  | plastidic glucose transporter 4                                |
| FGRRES_10098         | FGSG_10098            | FGSG_10098            | 8.72  | mfs-multidrug-resistance transporter                           |
| FGRRES_09345         | FGSG_09345            | FGSG_09345            | 8.77  | hypothetical protein FGSG_09345<br>[Fusarium graminearum PH-1] |
| FGRRES_03811         | FGSG_03811            | FGSG_03811            | 8.83  | hypothetical protein FGSG_03811<br>[Fusarium graminearum PH-1] |
| FGRRES_12240         | FGSG_12240            | FGSG_12240            | 8.92  | small s protein                                                |
| FGRRES_00224         | FGSG_00224            | FGSG_00224            | 9.05  | uncharacterized protein lw93_14870                             |
| FGRRES_11222         | FGSG_11222            | FGSG_11222            | 9.19  | hypothetical protein FGSG_11222<br>[Fusarium graminearum PH-1] |
| FGRRES_04743         | FGSG_04743            | FGSG_04743            | 9.20  | alpha-l-rhamnosidase c                                         |
| FGRRES_02294         | FGSG_02294            | FGSG_02294            | 9.35  | uncharacterized protein ffuj_14613                             |
| FGRRES_00062         | FGSG_00062            | FGSG_00062            | 9.44  | killer kp4 smk- core                                           |
| FGRRES_16154         | FGSG_04078            | FGSG_04078            | 9.48  | uncharacterized protein y057_217                               |
| FGRRES_03096         | FGSG_03096            | FGSG_03096            | 9.50  | hypothetical protein FGSG_03096<br>[Fusarium graminearum PH-1] |
| FGRRES_15709         | FGSG_00221            | FGSG_00221            | 9.53  | unnamed protein product [Fusarium<br>graminearum]              |
| FGRRES_12124_15979_M | FGSG_12124,FGSG_12125 | FGSG_12124,FGSG_12125 | 9.58  | k <sup>+</sup> channel protein                                 |
| FGRRES_11399         | FGSG_11399            | FGSG_11399            | 9.62  | fad binding domain-containing protein                          |
| FGRRES_13827         | FGSG_13827            | FGSG_13827            | 9.86  | conserved uncharacterized protein                              |
| FGRRES_10458         | FGSG_10458            | FGSG_10458            | 9.94  | c6 transcription factor                                        |
| FGRRES_16989_M       | FGSG_06989            | FGSG_06989            | 10.00 | protein serac1                                                 |
| FGRRES_04518         | FGSG_04518            | FGSG_04518            | 10.21 | uncharacterized protein y057_10431                             |
| FGRRES_10561         | FGSG_10561            | FGSG_10561            | 10.26 | glycoside hydrolase family 18 protein                          |
| FGRRES_10563_M       | FGSG_10563            | FGSG_10563            | 10.41 | uncharacterized protein y057_732                               |
| FGRRES_11368         | FGSG_11368            | FGSG_11368            | 10.64 | mannose-binding lectin                                         |

|              |                       |                       |       |         |                                                                                                                                                                                                                                                 |
|--------------|-----------------------|-----------------------|-------|---------|-------------------------------------------------------------------------------------------------------------------------------------------------------------------------------------------------------------------------------------------------|
| FGRRES_02645 | FGSG_02645            | FGSG_02645            | 10.78 |         | micromolar calcium activated neutral protease 1                                                                                                                                                                                                 |
|              |                       |                       |       |         | Non-essential protein of unknown function; has structural resemblance to plant storage and ligand binding proteins (canavalin, glycinin, auxin binding protein) and to some enzymes (epimerase, germin); localizes to the nucleus and cytoplasm |
| FGRRES_10191 | FGSG_10191            | FGSG_10191            | 10.85 | YML079W | duf985 domain protein                                                                                                                                                                                                                           |
| FGRRES_13109 | FGSG_13109            | FGSG_13109            | 10.88 |         | uncharacterized protein ffuj_03177                                                                                                                                                                                                              |
| FGRRES_06462 | FGSG_06462            | FGSG_06462            | 10.93 |         | coenzyme a synthetase                                                                                                                                                                                                                           |
| FGRRES_10395 | FGSG_10395            | FGSG_10395            | 11.38 |         | laccase precursor                                                                                                                                                                                                                               |
| FGRRES_17125 | FGSG_07989            | FGSG_07989            | 12.19 |         | unnamed protein product [Fusarium graminearum]                                                                                                                                                                                                  |
| FGRRES_03775 | FGSG_03775            | FGSG_03775            | 12.20 |         | zeaxanthin chloroplastic                                                                                                                                                                                                                        |
| FGRRES_04624 | FGSG_04624            | FGSG_04624            | 12.21 |         | hypothetical protein FGSG_04624 [Fusarium graminearum PH-1]                                                                                                                                                                                     |
| FGRRES_04740 | FGSG_04740            | FGSG_04740            | 12.28 |         | hypothetical protein FGSG_04740 [Fusarium graminearum PH-1]                                                                                                                                                                                     |
| FGRRES_11032 | FGSG_11032            | FGSG_11032            | 12.35 |         | galactose oxidase                                                                                                                                                                                                                               |
| FGRRES_17438 | FGSG_13809,FGSG_13810 | FGSG_13809,FGSG_13810 | 12.68 |         | membrane attack complex component perforin                                                                                                                                                                                                      |
| FGRRES_04450 | FGSG_04450            | FGSG_04450            | 13.27 |         | uncharacterized protein ffuj_09932                                                                                                                                                                                                              |



---

|                |            |            |       |                                               |
|----------------|------------|------------|-------|-----------------------------------------------|
| FGRRES_16373_M | FGSG_02894 | FGSG_02894 | 13.88 | sarcosine oxidase                             |
| FGRRES_09570   | FGSG_09570 | FGSG_09570 | 13.89 | uncharacterized protein lw93_14043            |
| FGRRES_05589   | FGSG_05589 | FGSG_05589 | 13.97 | atp-binding cassette protein                  |
| FGRRES_17151   | FGSG_09046 | FGSG_09046 | 14.04 | uncharacterized protein lw94_9396             |
| FGRRES_09372   | FGSG_09372 | FGSG_09372 | 14.80 | nitrogen metabolic regulation protein<br>nmr  |
| FGRRES_13433   | FGSG_13433 | FGSG_13433 | 15.18 | uncharacterized protein lw94_13071            |
| FGRRES_09187   | FGSG_09187 | FGSG_09187 | 15.27 | fusarubin cluster-dehydrogenase               |
| FGRRES_04019   | FGSG_04019 | FGSG_04019 | 15.54 | uncharacterized protein y057_9957             |
| FGRRES_17101_M | FGSG_08108 | FGSG_08108 | 16.17 | ankyrin repeat protein                        |
| FGRRES_16849_M | FGSG_08108 | FGSG_08108 | 16.18 | seed maturation protein pm25                  |
| FGRRES_17439   | FGSG_10700 | FGSG_10700 | 16.26 | membrane attack complex component<br>perforin |
| FGRRES_10604   | FGSG_10604 | FGSG_10604 | 17.89 | laccase precursor                             |
| FGRRES_10629   | FGSG_10629 | FGSG_10629 | 18.63 | tri13-cytochrome p450                         |
| FGRRES_03969   | FGSG_03969 | FGSG_03969 | 19.71 | uncharacterized protein ffuj_09374            |
| FGRRES_00114   | FGSG_00114 | FGSG_00114 | 19.88 | uncharacterized protein ffuj_03936            |

---

**Table S4.** Analysis DON production in the *Fgsfl1* mutant.

| Strain | DON/ppm <sup>a,b</sup>    |
|--------|---------------------------|
| PH-1   | 1130.1±303.0 <sup>A</sup> |
| SF-1   | 1063.9±264.0 <sup>A</sup> |
| CS-1   | 955.7±122.9 <sup>A</sup>  |

<sup>a</sup> Standard deviation (mean ± standard deviation) were calculated from at least three independent measurements. <sup>b</sup> Flowering wheat heads were inoculated and infected wheat kernels were harvested for DON assays 14 dpi.

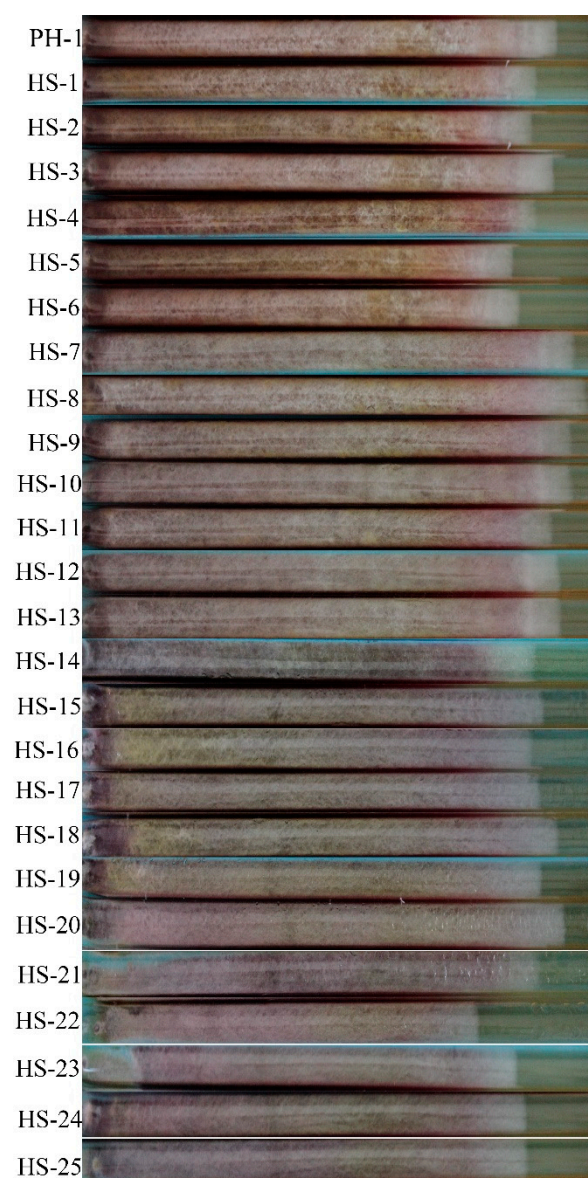**Figure S1.** Growth of spontaneous suppressor strains in race tube after cultivation for 15 days.

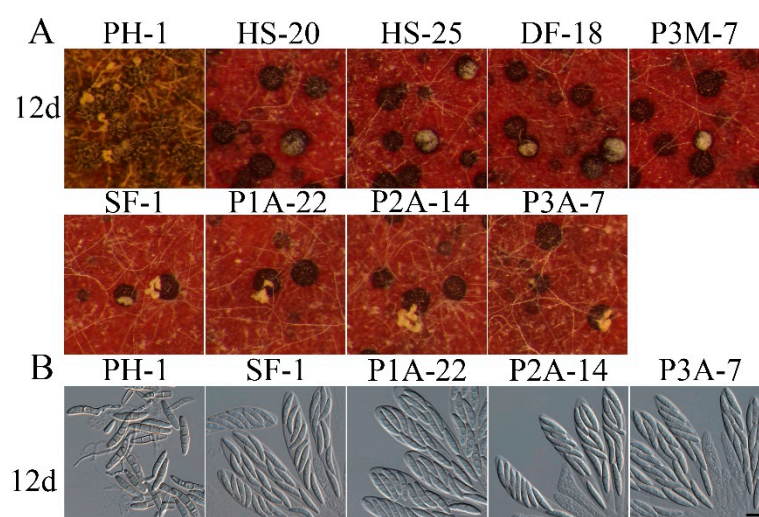

**Figure S2.** Analysis of ascospores discharge from HS-20, HS-25, DF-18, SF-1, P1A-22, P2A-14, and P3A-7 on carrot plate for 12 days. **A.** Carrot agar cultures of the wild-type strain PH-1, HS-20, HS-25, SF-1, DF-18, P1A-22, P2A-14, and P3A-7 were examined 7 days post-fertilization (dpf) and assay of perithecia of the wild-type strain PH-1, HS-20, HS-25, SF-1, DF-18, P1A-22, P2A-14, and P3A-7. **B.** Ascospores of the wild-type strain PH-1, SF-1, P1A-22, P2A-14, and P3A-7 were examined by differential interference contrast (DIC). Bar= 10  $\mu$ m.

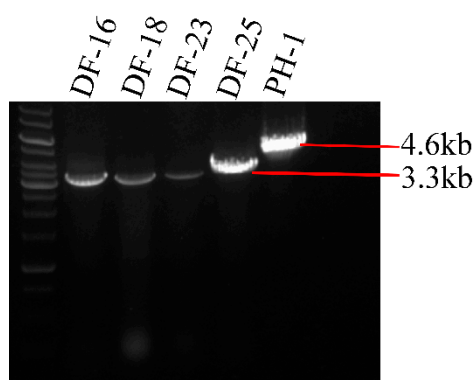

**Figure S3.** Putative *sfl1 cpkA cpk2* mutants were screened by PCR analysis. The target DNA stripes were amplified with FgSFL1-7F- FgSFL1-8R. Putative *Fgsfl1* mutants were identified (DF-16, DF-18, DF-23, DF-25).

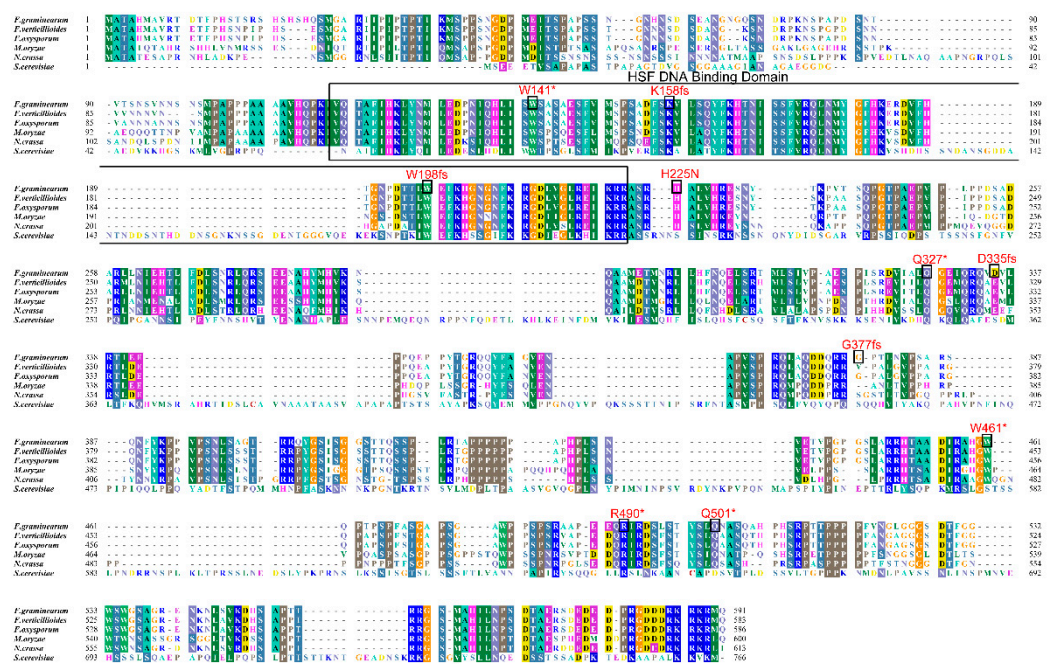

**Figure S4.** Sequence alignment of *SFL1*. Sequence of the selected fungal *SFL1* orthologues were aligned by Clustal X and viewed by BioEdit program. Identical amino acids are highlighted in the same color, conserved HSF binding domains is boxed in black. Amino acid changes in *SFL1* identified in 25 suppressor strains are labeled above the sequence alignments in red. The compared sequences were from *F. graminearum*, *S. cerevisiae*, *M. oryzae*, *N. crassa*, *F. pseudograminearum*, *F. oxysporum* and *F. verticillioides*.

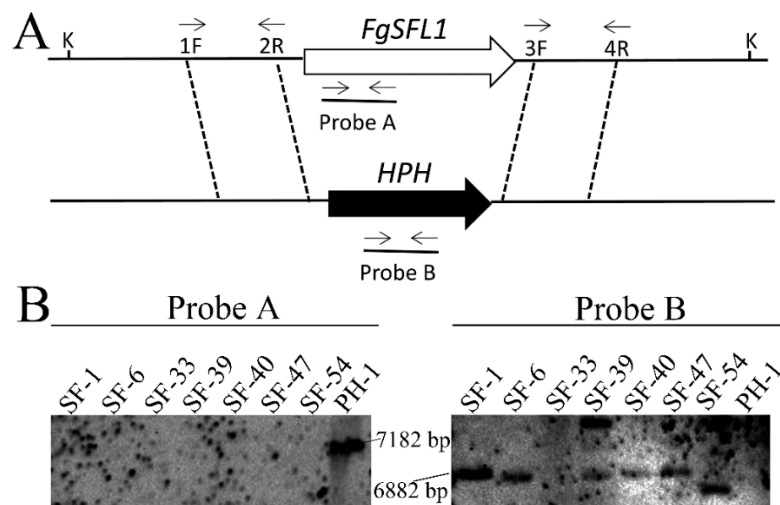

**Figure S5.** Putative *sfl1* mutants were screened by southern blot analysis. A. Schematic diagram of southern blot. B. Southern blot of *Fgsfl1* mutant.

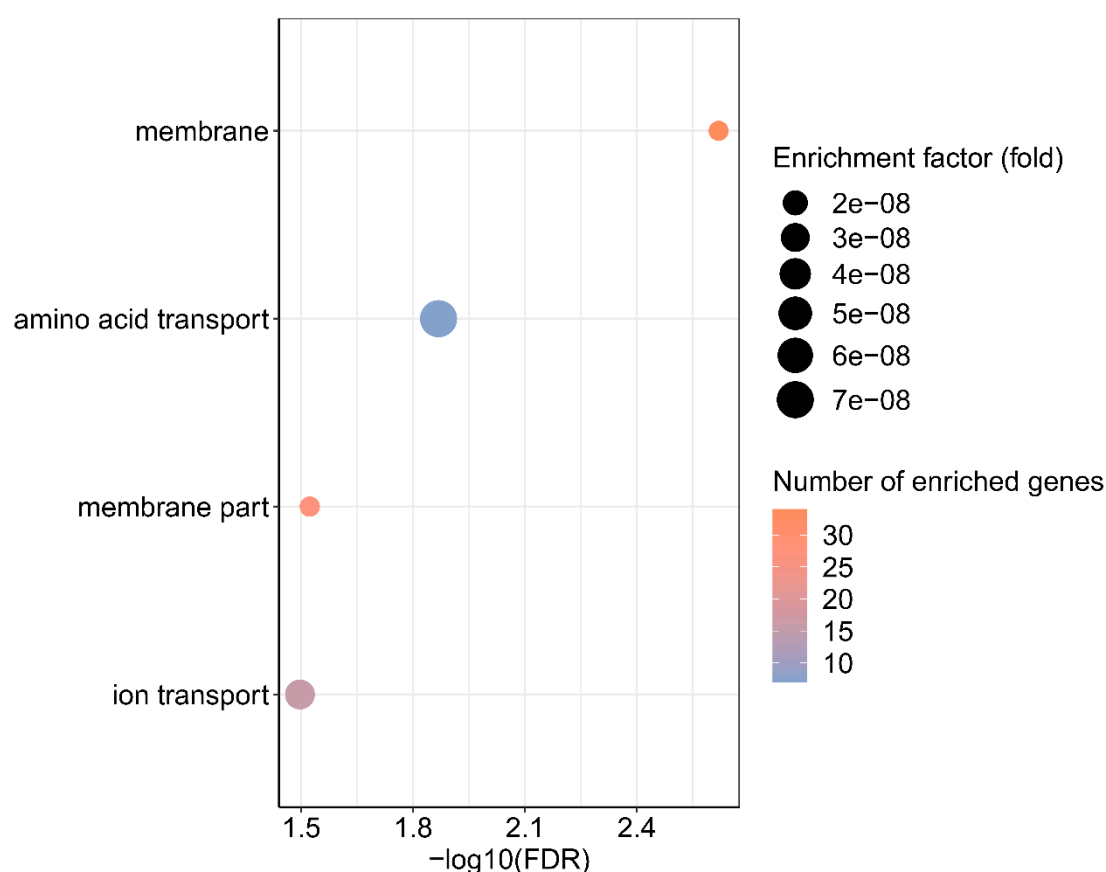

**Figure S6.** GO analysis of up-regulated genes in the 12-hours hyphae of the wild-type strain PH-1 and the *Fgsfl1* mutant.

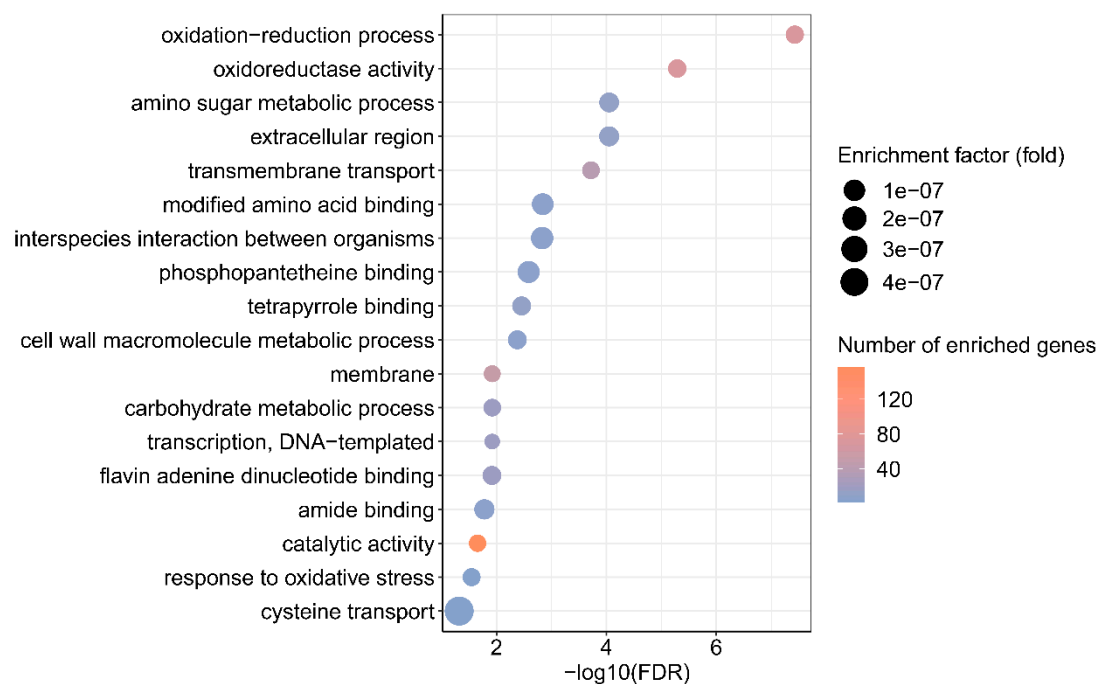

**Figure S7.** GO analysis of down-regulated genes in the 12-hours hyphae of the wild-type strain PH-1 and the *Fgsfl1* mutant.

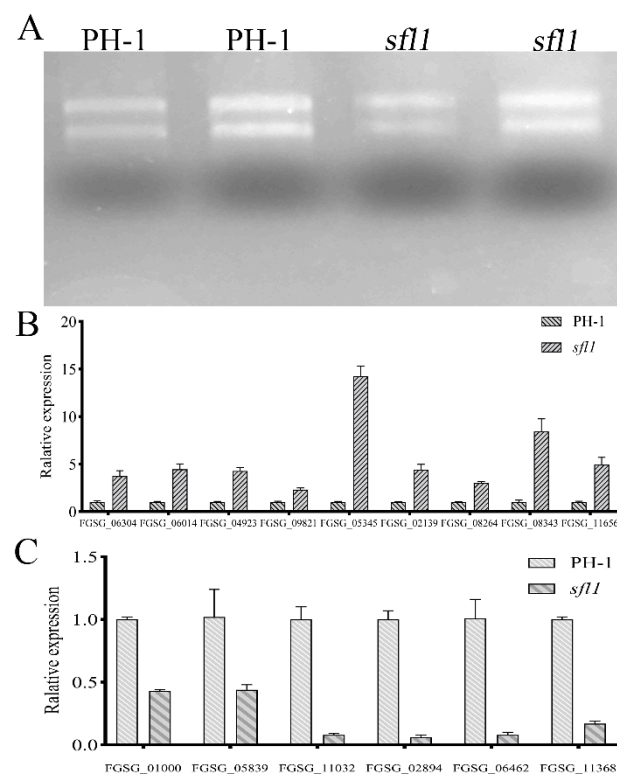

**Figure S8.** qRT-PCR analysis of the wild-type strain PH-1 and the *Fgsfl1* mutant. **A.** RNA gel detection of PH-1 and *sfl1* mutant. **B.** Up-regulation gene expression in the *sfl1* mutant in comparison with the wild type. **C.** Down-regulation gene expression in the *sfl1* mutant in comparison with the wild type.
